## 24 Introduction

25

26 During development, animal embryos typically set aside a group of primordial germ cells (PGCs)  
27 that later mature into germline stem cells (GSCs) and in turn give rise to gametes during  
28 adulthood (Nieuwkoop and Sutasurya, 1979, 1981; Wylie, 1999; Juliano, Swartz and Wessel,  
29 2010). The process of PGC specification both underpins the sexual reproduction cycle and  
30 involves transitions of pluripotency, making the mechanisms that distinguish germ cells from  
31 soma of critical importance in developmental and stem cell biology (Solana, 2013; Irie, Tang and  
32 Azim Surani, 2014; Magnúsdóttir and Surani, 2014). Comparative studies on germ cell  
33 development have defined two common mechanisms of PGC specification among diverse  
34 animals: preformation and epigenesis (Nieuwkoop and Sutasurya, 1979, 1981; Extavour and  
35 Akam, 2003). During PGC specification by preformation (e.g. *Drosophila*, *C. elegans* and *Danio*  
36 *rerio*), cytoplasmic determinants referred to as the germ plasm are maternally deposited into  
37 embryos and then segregated into specific blastomeres through cell division (Strome and Wood,  
38 1982; Williamson and Lehmann, 1996; Yoon, Kawakami and Hopkins, 1997). In contrast, there  
39 are neither maternal germline determinants nor pre-determined PGC fates in specific  
40 blastomeres in epigenic PGC specification. For example, BMP signaling is required for PGC  
41 specification from precursor cells in mouse, axolotl, and cricket embryos (Lawson *et al.*, 1999;  
42 Chatfield *et al.*, 2014; Nakamura and Extavour, 2016). The epigenesis mode of PGC specification  
43 is more prevalent across the animal kingdom, and therefore hypothesized to reflect mechanisms  
44 present in the cnidarian-bilaterian common ancestor (Extavour and Akam, 2003). However, to  
45 date, no mechanistic studies of PGC specification in early branching animals have functionally  
46 tested this hypothesis.

47

48 Cnidarians (jellyfish, sea anemones and corals) are the closest sister group to bilaterians and  
49 occupy an ideal phylogenetic position for investigating likely developmental traits of the  
50 eumetazoan common ancestor (Technau and Steele, 2011; Russell *et al.*, 2017). Among  
51 cnidarians, the sea anemone *Nematostella vectensis* maintains distinct adult gonad tissue and  
52 features PGC specification dynamics hypothesized to partially reflect ancient epigenesis based

53 on expression patterns of conserved germline genes (Extavour *et al.*, 2005). Additionally, a well-  
54 annotated genome (Putnam *et al.*, 2007), defined developmental stages (Fritzenwanker *et al.*,  
55 2007) and diverse genetic tools (Ikmi *et al.*, 2014; Renfer and Technau, 2017; He *et al.*, 2018;  
56 Karabulut *et al.*, 2019) make *Nematostella* a genetically tractable model to elucidate  
57 developmental mechanisms controlling PGC specification.

58

59 In this study, we explore mechanisms of PGC development in *Nematostella* and test whether the  
60 putative PGC clusters are specified by maternal or zygotic control. We first follow the  
61 development of putative PGCs and provide evidence supporting their germ cell fate in adults. We  
62 then leverage shRNA knockdown and CRISPR/Cas9 mutagenesis to interrogate the  
63 developmental requirements for the Hedgehog signaling pathway in PGC specification. From  
64 these results, we conclude that Hh signaling is either directly or indirectly required for PGC  
65 specification in *Nematostella*. As Hh signaling is only activated zygotically, these data indicate an  
66 epigenic mechanism for *Nematostella* PGC specification and support the inference that the  
67 eumetazoan common ancestor specified PGCs via epigenesis.

68

69

## 70 Results

71

### 72 Evidence that PGCs form in primary polyps and migrate to gonad rudiments

73

74 The localized expression of the conserved germline genes *vasa*, *nanos*, and *piwi* suggest that  
75 *Nematostella* PGCs arise within two cell clusters of the pharyngeal endomesoderm of primary  
76 polyps (Fig. 1, Fig. S1; Extavour *et al.*, 2005; Praher *et al.*, 2017). To follow the development of  
77 putative PGCs at higher spatio-temporal resolution, we generated a polyclonal antibody against  
78 *Nematostella* Vasa2 (Vas2) and used immunohistochemistry and fluorescent *in situ* hybridization  
79 to confirm that Vas2 was co-expressed with *piwi1* and *piwi2* in the putative PGC clusters (Fig. S1  
80 E-L). Further supporting their germline identity, we also found that *tudor* was enriched in  
81 putative PGC clusters (Fig. S1 M-P). To gain more detailed spatial information, we reconstructed  
82 confocal z stack images in 3D and found that Vas2+ epithelial cell clusters were localized at  
83 endomesodermal junctions where the pharyngeal endomesoderm connects to the primary  
84 mesenteries (Fig. 2B-B'; Sup. Mov.1).

85

86 Adult *Nematostella* harbor mature gonads in all eight internal mesentery structures (Fig. S2A-C  
87 E-E'; Williams, 1975; Frank and Bleakney, 1976). If the two Vas2+ epithelial cell clusters are the  
88 only precursors for adult germ cells, it follows that these cells would have to delaminate and  
89 migrate to populate the eight gonad rudiments. Alternatively, new PGCs could arise within each  
90 of the six non-primary mesenteries, perhaps at a later developmental stage. To distinguish  
91 between these possibilities, we examined the localization of Vas2-expressing putative PGCs in  
92 primary polyps and later juvenile stages. In the majority of primary polyps, putative PGCs initially  
93 appeared in two coherent clusters at 10 days-post-fertilization (dpf, Fig. 2B-B', Fig. 3A-A'). In older  
94 primary polyps (>10 dpf), some PGC clusters cells appeared to stretch basally through the  
95 underlying cell-free mesoglea (Fig. 2C-C'). After feeding for more than a week, primary polyps  
96 start adding tentacles and enter the juvenile stage. Interestingly, upon feeding, Vas2-expressing  
97 putative PGCs appeared to delaminate from the epidermis into the underlying mesoglea (Fig. 2D-  
98 D'). Delaminated Vas2 positive cells displayed a fibroblast-like morphology with filopodial

99 protrusions, similar to other migratory cell types (Fig. S3; Scarpa and Mayor, 2016). Consistent  
100 with migratory potential, Vas2+ cells also expressed *twist* (Fig. S1Q-T), a conserved regulator of  
101 mesoderm development and a marker of metastatic cancer cells (Yang *et al.*, 2004; Kallergi *et al.*,  
102 2011).

103

104 We next followed the localization of putative PGCs through successive developmental timepoints.  
105 While specification of additional PGC clusters was not observed, we did find evidence for a  
106 process of radial cell migration between mesenteries at the level of the aboral end of the pharynx,  
107 where the mesoglea between ectoderm and endomesoderm increases in volume after the  
108 primary polyp stage (Fig. 2E-E'). The majority of 10 dpf primary polyps showed PGCs within  
109 clusters, while >10 dpf primary polyps showed some PGCs localized between the primary  
110 mesenteries and segment S1 (Fig. 2C, Fig. 3B-B'; He *et al.*, 2018). The direction of this initial  
111 migration was away from the high BMP activity domain along the directive axis (Genikhovich *et*  
112 *al.*, 2015), suggesting the potential existence of attractive/repulsive signals for migratory PGCs.  
113 Additionally, we found that putative PGCs migrated aborally from the clusters at the pharyngeal  
114 level to the mesenteries, where gonad rudiments will mature in adults (Fig. 3C-D'). Combining  
115 all observations, we hypothesize that in *Nematostella*, putative PGCs initially form as two  
116 endomesodermal cell clusters at the level of the aboral pharynx, delaminate into the cell-free  
117 mesoglea layer between the ectoderm and endomesoderm possibly via epithelial-mesenchymal  
118 transition (EMT), and then migrate to the gonad rudiments during juvenile development.

119

120

### 121 **Evidence that putative PGCs mature and give rise to germ cells in adult gonads**

122

123 To assess the germline identity of putative PGCs, we next followed the development of Vas2+  
124 cells from juvenile stages to young adults (>2-months old). In maturing polyps, the  
125 endomesodermal mesenteries are organized from proximal (external) to distal (internal) into  
126 parietal muscles, retractor muscles, gonads and septal filaments, with occasionally observed  
127 ciliated tracts between the gonads and septal filaments (Fig. 4A-D, Fig. S2H; Williams, 1979;

128 Jahnel, Walzl and Technau, 2014). In juvenile polyps, Vas2+ cells were observed in the mesoglea  
129 between the septal filaments and the retractor muscles (Fig. 4C), an endomesodermal region  
130 that will later form adult gonad epidermis (Fig. S2H). We also occasionally observed putative PGCs  
131 between the ciliated tracts and the retractor muscles (Fig. 4D). After feeding for 8 weeks, most  
132 polyps reached the 12-tentacle stage and the mesenteries progressively matured, becoming  
133 wider and thicker. At this stage we observed Vas2+ putative PGCs in the maturing gonad region,  
134 along with Vas2+ immature oocytes or sperm cysts in females and males, respectively (Fig. 4E-F,  
135 Fig. S4). In adult mesenteries, similar putative PGCs were found in the vicinity of oocytes and  
136 sperm stem cells, as well as the aboral domains of the mesenteries (Fig. S2). Taken together,  
137 these observations suggest that the putative PGCs comprise a continuous Vas2-expressing  
138 lineage that proliferates and ultimately gives rise to mature germ cells for *ex vivo* sexual  
139 reproduction (Fig. S5, S6, Sup. Mov. 2). As proposed by previous work (Extavour *et al.*, 2005),  
140 these data support the hypothesis that the germline gene-expressing cell clusters of primary  
141 polyps represent *bona fide* PGCs of *Nematostella*.

142

143

#### 144 **Evidence supporting a zygotic mechanism for primordial germ cell specification**

145

146 We next investigated whether developing *Nematostella* form PGCs by a maternal preformation  
147 program or by a zygotically-driven epigenic process. In preformation, maternally-deposited  
148 germline determinants are segregated into specific PGC precursors during early cleavage  
149 (Nieuwkoop and Sutasurya, 1979, 1981; Extavour and Akam, 2003). In *Nematostella*, prior to the  
150 appearance of putative PGC clusters in developing polyps, we observed maternally-deposited  
151 perinuclear Vas2 granules that could hypothetically serve as germline determinants (Fig. 1E).  
152 These granules were previously identified with an independent antibody and proposed to  
153 regulate *Nematostella* piRNAs (Praher *et al.*, 2017). However, perinuclear Vas2 granules were  
154 not restricted to a set of germline precursor cells and were distributed homogenously around  
155 oocyte germinal vesicles (Fig. S2B), in every cell of blastulae, and in most endomesodermal cells  
156 after gastrulation (Fig. 1E; Praher *et al.*, 2017). In endomesodermal cells, Vas2+ granules gradually

157 diminished when the putative PGC cluster cells activated Vas2 expression (Fig. 1E-H), suggesting  
158 germ cell fates were gradually specified from among endomesodermal precursor cells rather  
159 than being maternally pre-determined. Furthermore, germline gene transcripts (i.e. *vas1*, *vas2*,  
160 *nos2* and *p110*) displayed a homogenous distribution in the endomesoderm of embryos and  
161 larvae before PGC specification (Extavour *et al.*, 2005). Endomesodermal enrichment of  
162 “germline” genes before *Nematostella* PGC formation could be consistent with the proposed  
163 germline multipotency program (GMP), where the expression of conserved germline genes  
164 underlies multipotency of progenitor cells (Juliano, Swartz and Wessel, 2010). In line with GMP  
165 hypothesis, we hypothesize that *Nematostella* PGCs are zygotically specified from a pool of  
166 multipotent endomesodermal precursors.

167  
168 In primary polyps, putative PGC clusters initially form in the two primary mesenteries, which are  
169 distinguished by the presence of aborally-extended regions of pharyngeal ectoderm known as  
170 septal filaments (Sup. Mov. 1, Fig. S7A-A’). While the mechanism of primary mesentery  
171 specification is unknown, this process likely lies downstream of Hox-dependent endomesodermal  
172 segmentation in developing larvae. Interestingly, segmentation of the presumptive primary  
173 mesenteries is disrupted in both *Anthox6a* mutants and *Gbx* shRNA-KD polyps (He *et al.*, 2018).  
174 In both loss of function conditions, we observed aberrant attachment of the septal filaments and  
175 the associated induction of PGC clusters in non-primary septa (Fig. S7B-D’). This suggests that the  
176 precise location of the putative PGC clusters can be subject to regulation, and hints at the  
177 existence of zygotic PGC-inducing signals from the pharyngeal ectoderm.

178

179

### 180 **PGC specification is dependent on zygotic Hedgehog signaling activity**

181

182 Previous gene expression studies have suggested that the Hh signaling pathway may be involved  
183 in patterning the endomesoderm and potentially the formation of germ cells (Matus *et al.*, 2008).  
184 Using double fluorescent *in situ* hybridization to detect the expression of *Nematostella*  
185 *hedgehog1* (*hh1*) and its receptor *patched* (*ptc*) in late planula larvae, we found that both ligand

186 and receptor were expressed in reciprocal domains of ectoderm and endomesoderm associated  
187 with the pharynx (Fig. 5A). Later, the PGC clusters appeared within the endomesodermal *ptc*  
188 expression domain, adjacent to where *hh1* is expressed in the pharyngeal ectoderm (Fig. 5B-D).  
189 Because PGCs formed in association with the juxtaposed *hh1* and *ptc* expression domains, we  
190 hypothesized that Hh signaling may direct neighboring endomesodermal cells to assume PGC  
191 identity (Fig. 5E).

192

193 To test functional requirements for Hh signaling in *Nematostella* development, we used shRNA-  
194 mediated knockdown and CRISPR/CAS9-directed mutagenesis (Ikmi *et al.*, 2014; Kraus *et al.*,  
195 2016; He *et al.*, 2018). Unfertilized eggs were injected with shRNAs targeting either *hh1* or *gli3* (a  
196 transcription factor downstream of Hh signaling) or with two independent *gli3* gRNAs. Using the  
197 expression of Vas2 protein and *piwi1* transcript as readouts for PGC identity, we found that PGC  
198 specification was significantly inhibited in both knockdown and in presumptive F0 mutant  
199 primary polyps (Fig. 5F-J, Fig. 7J-L). These data suggest the Hh signaling pathway is required for  
200 *Nematostella* PGC specification.

201

202 During Hh signal transduction, binding of Hh ligand to Ptc de-represses the transmembrane  
203 protein Smoothed (Smo), which in turn activates a cytoplasmic signaling cascade (Forbes *et al.*,  
204 1993; Alcedo *et al.*, 1996; Stone *et al.*, 1996; van den Heuvel and Ingham, 1996; Bangs and  
205 Anderson, 2017). To further test the involvement of Hh signaling in PGC formation, we treated  
206 developing animals with the Smo antagonists GDC-0449 or Cyclopamine (McCabe and Leahy,  
207 2015; Sharpe *et al.*, 2015). When we treated embryos with either inhibitor, PGC numbers were  
208 significantly reduced (Fig. 6). To test Hh requirements for the establishment versus maintenance  
209 of PGC identity, we treated developing *Nematostella* with GDC-0449 either during PGC formation  
210 (4-8 dpf) or post-PGC formation (8-12 dpf, Fig. S8). PGC formation in 4 to 8 dpf late-planula larvae  
211 was significantly inhibited by GDC-0449 treatment (Fig. S8B, compare Ctrl and GDC), while PGC  
212 number showed no significant difference when the pathway is inhibited after specification (Fig.  
213 S8B, compare Ctrl-Ctrl and Ctrl-GDC). Furthermore, when we compared no-inhibition,  
214 continuous-inhibition and released-from-inhibition conditions (Fig. S8B, compare Ctrl-Ctrl, GDC-



215 GDC and GDC-Ctrl), PGC numbers did not vary significantly. These observations suggest that even  
216 though initial PGC formation is Hh dependent, the PGC population can be dynamically  
217 replenished, potentially through cell proliferation. Additionally, we did not observe PGC  
218 migration defects in different combinations of GDC-0449 treatments. At 12 dpf we found that  
219 half of treated polyps still showed the expected PGC migration away from the clusters (18 of 29  
220 in Ctrl-Ctrl; 18 of 30 in Ctrl-GDC; 19 of 30 in GDC-GDC; 16 of 30 in GDC-Ctrl). Therefore, Hh  
221 signaling is not likely to be involved in PGC migration after their initial specification.

222

223

### 224 **Hh signaling regulates endomesodermal patterning and PGC specification**

225

226 To definitively test the requirements for Hh signaling in *Nematostella*, we used an established  
227 CRISPR/Cas9 methodology to mutate *hh1* (Ikmi *et al.*, 2014; Kraus *et al.*, 2016; He *et al.*, 2018).  
228 These efforts generated two F1 heterozygous frame-shift lines (a -1 nucleotide frameshift in  
229 *hh1*<sup>Δ1</sup>/*+* and a +2 nucleotide frameshift in *hh1*<sup>+2</sup>/*+*; see Materials and Methods). In F2 progeny  
230 resulting from crosses between heterozygous F1 siblings, we observed developmental defects in  
231 primary polyps wherein body length was reduced by approximately 50% and the four primary  
232 tentacles failed to elongate and partially fused together (Fig. 7B-C'). Consistent with a defect in  
233 Hh signal transduction, homozygous mutants expressed lower levels of *ptc*, a conserved Hh  
234 pathway target gene (Fig. 7D-E').

235

236 Primary polyps homozygous for either *hh1* mutant allele developed primary mesentery-like  
237 endomesodermal septa; however, we did not observe *Vas2*, *piwi1* or *tudor* expressing PGC-like  
238 cluster cells (Fig. 7A-I'). Morphological analysis revealed abnormal internal tissue patterning in  
239 *hh1* homozygous mutants. The developing pharynx and primary septal filaments are normally  
240 connected to body wall ectoderm via endomesodermal tissue (Fig. 8A-A'). In contrast, in *hh1*  
241 mutants part of the pharynx and the primary septal filaments were in direct contact with the  
242 ectoderm without endomesodermal tissue in between (Fig. 8B-B'). As a result, the eight  
243 segments of the larval body plan were abnormally segregated into groups of three and five

244 segments by the pharynx (Fig. 8B-B'). These strong endomesodermal patterning defects were not  
245 observed in *hh1* and *gli3* shRNA knockdowns, suggesting PGC formation may require a higher  
246 level of Hh signaling activity than endomesoderm patterning. The primary polyp-like *hh1*  
247 homozygous mutants passed through gastrulation, suggesting that the pharynx and the  
248 endomesoderm likely formed a continuous epithelium (Fig. 7B' and C'). Consistent with the  
249 hypothesis that a pharyngeal signal induces PGC development, *hh1* mutants failed to develop  
250 PGCs even though the pharynx associated with the endomesoderm. Nevertheless, without more  
251 sophisticated genetic tools, we cannot rule out the possibility that PGC formation was indirectly  
252 perturbed by Hh-dependent endomesodermal patterning defects. In either case, we conclude  
253 that zygotic signaling activity is required for specification of the putative PGC clusters.

254

255

#### 256 **PGC formation in *ptc* mutants may reflect a default Hh activation without the receptor**

257

258 In bilaterian model systems, Ptc has been shown to serve as a receptor for the Hh ligand and to  
259 inhibit the pathway when the ligand is absent (Johnson, Milenkovic and Scott, 2000). To further  
260 interrogate the mechanism of PGC specification in *Nematostella*, we generated two *ptc*  
261 heterozygous mutant lines (a -2 nucleotide frameshift in *ptc*<sup>A2</sup>/+ and a -20 nucleotide frameshift  
262 in *ptc*<sup>A20</sup>/+, see Materials and Methods). Crosses between *ptc*<sup>A2</sup>/+ or *ptc*<sup>A20</sup>/+ heterozygous  
263 siblings resulted in the expected 25% of homozygous progeny by genotyping, and these  
264 developed into abnormal mushroom-shaped polyps which lacked the four primary tentacles  
265 (Fig. 8C-D). Detailed morphological examination and Vas2 immunofluorescence revealed that  
266 the *ptc* homozygous mutants developed a pharynx, eight endomesoderm mesenteries, and two  
267 PGC clusters (Fig. 8D-E'). Combined with the requirement for *hh1*, *gli3* and Smo activity during  
268 PGC specification, we propose that the presence of Hh ligand or absence of *ptc* activates the  
269 pathway. In turn, zygotic Hh signaling provides permissive conditions for PGC formation at the  
270 pharyngeal domain of *Nematostella* endomesoderm.

## 271 Discussion

272

273 In this report, we confirm that *Nematostella* putative PGCs form in pharyngeal endomesoderm  
274 and provide evidence that these cells delaminate via EMT and migrate through the mesoglea to  
275 populate the eight gonad primordia. We also present evidence that putative PGCs form between  
276 the expression domains of *hh1* and *ptc* and demonstrate that Hh signaling is required for PGC  
277 specification but not PGC maintenance. Because Hh signaling transducers are only expressed  
278 zygotically (Matus *et al.*, 2008; Lotan *et al.*, 2014), these data indicate that *Nematostella* employs  
279 an epigenic mechanism to specify PGC fate, which is consistent with the proposed ancestral  
280 mechanism for metazoan PGC specification (Extavour and Akam, 2003). It remains possible that  
281 maternally inherited germline determinants still play some essential role in PGC specification and  
282 that zygotic Hh activity serves to augment their function. In this combined maternal-zygotic  
283 scenario, the mechanism of *Nematostella* PGC formation would not neatly fit within either  
284 preformation or epigenesis and instead fall within the continuum between either extreme,  
285 similar to sea urchin PGCs (Seervai and Wessel, 2013).

286

### 287 Hh pathway activity in *ptc* mutants

288 In many bilaterian model organisms *ptc* is a transcriptional target of Hh signaling and serves as  
289 both a receptor and negative regulator of pathway activity (Briscoe and Théron, 2013; Bangs  
290 and Anderson, 2017). We sought to functionally dissect Hh signaling in *Nematostella* and  
291 leveraged CRISPR/Cas9 mutagenesis to generate both *hh1* and *ptc* mutants. While *hh1* mutants  
292 lacked putative PGC cell clusters (Fig. 7), to our surprise these cells formed properly in *ptc* mutant  
293 animals (Fig. 8). This finding could be consistent with three possible scenarios: **1)** The existence  
294 of residual receptor activity due to allele-specific effects or potential redundancy with an  
295 unannotated orthologue elsewhere in the genome; **2)** An indirect role for Hh in PGC specification;  
296 **3)** A default repressive role for Ptc in the specification of pre-patterned PGC clusters. Because  
297 inhibiting Hh activity by disrupting either *Smo* or *gli3* also disrupted PGC formation, we suggest  
298 that *ptc* most likely serves as a default inhibitor of Hh activity in *Nematostella*. Based on our  
299 combined data, we propose that the pharyngeal ectoderm releases Hh ligand to inhibit Ptc-

300 dependent repression of PGC fate in neighboring endomesoderm. This reasoning would suggest  
301 that the PGC clusters are pre-patterned by other yet-identified extracellular signals, and that the  
302 role of Hh activity may be to provide a spatial or temporal cue to trigger their maturation.

303

### 304 **Direct versus indirect roles for Hh activity in PGC specification**

305 To our knowledge, Hh signaling has not been directly implicated in PGC specification in previous  
306 studies of established bilaterian systems. Nevertheless, a requirement for Hh signaling during  
307 *Nematostella* PGC formation is supported by three lines of evidence: **1)** *hh1* and *gli3* shRNA  
308 knockdowns (Fig. 5); **2)** Smo inhibition assays (Fig. 6); and **3)** *hh1* and *gli3* CRISPR/Cas9  
309 mutagenesis (Fig. 7). In developing primary mesenteries, PGCs are specified in endomesoderm  
310 cells that lie in close proximity to the *hh1* expression domain in adjacent pharyngeal ectoderm  
311 (Fig. 5). Even in the absence of primary mesenteries in *Anthox6a* mutants and *Gbx* knockdown  
312 juveniles (Fig. S7; He *et al.*, 2018), PGCs still develop from endomesodermal cells in proximity to  
313 *hh1*-expressing ectodermal septal filament cells. Interestingly, while *hh1* expression seems to be  
314 restricted to the pharyngeal ectoderm and septal filaments, we observed broad  
315 endomesodermal patterning defects in *hh1* mutants (Fig. 8). This phenotype was not seen in  
316 either knockdown experiments or inhibitor assays where PGC specification was nevertheless  
317 inhibited (Fig. 5 and Fig. 6). This could suggest that the PGC defects in *hh1* mutants are not an  
318 indirect result of aberrant endomesodermal patterning. Still, looking forward, genetic tools that  
319 allow the discrimination between cell autonomous and cell non-autonomous genetic  
320 requirements will be required to definitively rule out whether PGC formation is directly or  
321 indirectly regulated by Hh signaling.

322

### 323 **Future perspectives:**

324 In this report, we provide an initial framework demonstrating an epigenic PGC formation  
325 mechanism in *Nematostella vectensis*, a representative early-branching animal. Because Hh  
326 signaling components are found in choanoflagellates and the Hh pathway dictates neighbor cell  
327 fates throughout developing metazoans (Adamska *et al.*, 2007; King *et al.*, 2008), it remains  
328 possible that this pathway distinguishes germline and soma in other animals as well.

329 Alternatively, the requirement for Hh signaling in *Nematostella* PGC formation could be a  
330 lineage-specific feature of sea anemones, which could be addressed through a broad sampling  
331 of PGC development in diverse anthozoan cnidarians.

## 332 **Materials and methods**

333

### 334 **Animal husbandry**

335 Maintenance and spawning of *N. vectensis* followed previously established protocols (Stefanik,  
336 Friedman and Finnerty, 2013). Embryos were cultured at 24 °C for consistent developmental  
337 staging.

338

339

### 340 **Generation of anti-Vas2 antibody**

341 A His-tagged antigen for raising polyclonal Rabbit-anti-Vas2 antibody was designed, synthesized  
342 and purified by GenScript (Piscataway, NJ). The antigen sequence  
343 (MCFKCQQTGFHARECPNESAAGENGDRPKPVITYVPPTPTDEEEMFRSTIQQGINFKEYDQIEVLVSGNNP  
344 VRHINSFEEANLYEAFLNVRKAQYKKPTPHHHHHH) partially encompasses the last zinc finger  
345 domain and the DEAD-like helicase domain of Vas2. In brief, the rabbit was immunized 3 times  
346 before checking the antibody titer, boosted once more and sacrificed for the whole serum. The  
347 serum was affinity purified, and the polyclonal antibody stock concentration is 0.4 mg/mL.

348

349

### 350 **Whole-mount immunofluorescence**

351 Our immunohistochemical staining protocol generally followed Genikhovich and Technau  
352 (2009), with the following modifications: samples were blocked in 5% goat serum diluted in PBS  
353 with 0.2% Triton X-100 (PTx) and 10% DMSO for increasing antibody penetration. Samples were  
354 then incubated in 1:1000 diluted stock of Rabbit-anti-Vas2 antibody in PTx with 0.1% DMSO and  
355 5% goat serum at 4 °C overnight. After six washes with PTx for at least 20 minutes each at room  
356 temperature, samples were incubated with Alexa Fluor Goat-anti-Rabbit secondary antibodies  
357 (Thermo Fisher Scientific; Waltham, MA) at 1:500 dilution in PTx with 5% goat serum at 4 °C  
358 overnight. If desired, during secondary antibody incubation, samples were counter-stained for  
359 F-Actin with Phalloidin at 1:200 dilution (Thermo Fisher Scientific) and nuclei with either 1  
360 µg/mL of Hoechst-34580 (Sigma-Aldrich; St. Louis, MO; Cat. No. 63493) or 1:5,000 diluted  
361 SYBR™ Green I (Thermo Fisher Scientific; Cat. No. S7567). After several washes, samples were  
362 serially immersed in a final solution of 80% of glycerol in PTx. Alternatively, we dehydrated  
363 samples in isopropanol and immersed in BABB (one part of benzyl alcohol and two parts of  
364 benzyl benzoate) to clear the tissue, allowing up to 400 µm imaging depth (Wan *et al.*, 2018).

365

366

### 367 **Whole-mount fluorescent *in situ* hybridization (FISH)**

368 To clone target genes, purified total RNA was reverse transcribed into cDNA by ImProm-II™  
369 Reverse Transcription System (Promega; Madison, WI; Cat. No. A3800). Target gene fragments  
370 were first amplified from a mixed cDNA library of planula larva and primary polyps. Primers are  
371 listed in Table S1. We adopted a ligation-independent pPR-T4P cloning method (Newmark *et al.*,  
372 2003) to generate plasmids with probe templates and confirmed the positive clones by  
373 sequencing. We then PCR amplified the DNA template fragments using the AA18

374 (CCACCGTTCATGGCTAGC) and PR244 (GGCCCCAAGGGGTTATGTGG) primers, which flank the  
375 T7 promoter and the target gene sequence. After purifying DNA templates, we synthesized DIG-  
376 labeled RNA probes with the DIG RNA labeling mix (Sigma-Aldrich; Cat. No. 11277073910) and  
377 T7 RNA polymerase (Promega; Cat. No. P2077). Sample preparation, probe hybridization and  
378 signal detection followed established protocols (Steinmetz *et al.*, 2017; He *et al.*, 2018). The  
379 probe working concentration was 0.5 ng/ $\mu$ L for all genes.

380  
381 For double FISH, we synthesized fluorescein-labeled RNA probes with the Fluorescein RNA  
382 labeling mix (Sigma-Aldrich; Cat. No. 11685619910) and hybridized together with a DIG-labeled  
383 probe of another gene. After detecting the first probe signal with TSA<sup>®</sup> fluorescein reagent  
384 (PerkinElmer; Waltham, MA) and several washes with TNT buffer, we quenched peroxidase  
385 activity by incubating samples in 200 mM NaN<sub>3</sub>/TNT for 1 hour. Samples were then washed six  
386 times with TNT for at least 20 min each and then subjected to second-round probe detection by  
387 either anti-DIG-POD Fab fragments (Sigma-Aldrich; Cat. No. 11207733910) or Anti-Fluorescein-  
388 POD Fab fragments (Sigma-Aldrich; Cat. No. 11426346910).

389  
390

### 391 **Short hairpin RNA knockdown**

392 shRNA design, synthesis and delivery followed the protocol of He *et al.* (2018) with the  
393 following modification: A reverse DNA primer containing the shRNA stem and linker sequence  
394 was annealed with a 20nt T7 promoter primer (TAATACGACTCACTATAGGG). The annealed,  
395 partially double stranded DNA directly served as template for *in vitro* transcription. We tested  
396 knockdown efficiency with shRNA produced by this modified method by targeting  *$\beta$ -catenin*  
397 and *dpp* shRNA, and found the same phenotypic penetrance as the previous method (He *et al.*,  
398 2018; Karabulut *et al.*, 2019). To control for shRNA toxicity, we injected 1000 ng/ $\mu$ L eGFP shRNA  
399 and did not observe noticeable developmental defects. All shRNA working solutions were  
400 prepared at 1000 ng/ $\mu$ L and the sequences are listed in Table S2. By 8 dpf, primary polyps were  
401 fixed to assay PGC development.

402  
403

### 404 **Generation of mutant lines by CRISPR/Cas9 mutagenesis**

405 *hh1* and *ptc* mutant lines were generated using established methods (He *et al.*, 2018). In brief,  
406 to generate F0 founders, we co-injected 500ng/ $\mu$ L of gRNA (sequences listed in Table S3)  
407 and 500ng/ $\mu$ L of SpCas9 protein into unfertilized eggs. Mosaic F0 founders were then crossed  
408 with wild-type sperm or eggs to create a heterozygous F1 population. When the F1 polyps  
409 reached juvenile stage, we genotyped individual polyps by cutting tentacle samples; resultant  
410 alleles are as described in Table S4. Heterozygous carriers of insertion/deletion-induced frame-  
411 shift alleles were crossed to generate homozygous mutants. The phenotypes and genotypes of  
412 this F2 population followed mendelian inheritance and were subjected to further analysis. In  
413 progeny resulting from a *hh1* <sup>$\Delta$ 1</sup>/*+* cross, the observed phenotypic ratio of wild-type and mutant  
414 primary polyps was 948:343, close to the expected mendelian ratio. Progeny from  
415 heterozygous crosses were also randomly genotyped and confirmed to follow the expected  
416 1:2:1 ratio (+/+ : *hh1* <sup>$\Delta$ 1</sup>/*+* : *hh1* <sup>$\Delta$ 1</sup>/*hh1* <sup>$\Delta$ 1</sup> = 6:14:8 and +/+ : *hh1*<sup>+2</sup>/*+* : *hh1*<sup>+2</sup>/*hh1*<sup>+2</sup> = 7:16:6). A  
417 similar strategy was used to analyze *ptc* mutants. *ptc* mutant genotypes also followed

418 mendelian segregation (+/+ :  $ptc^{\Delta 2}/+$  :  $ptc^{\Delta 2}/ptc^{\Delta 2}$  = 5:17:8; (+/+ :  $ptc^{\Delta 20}/+$  :  $ptc^{\Delta 20}/ptc^{\Delta 20}$  =  
419 7:12:11). These results suggest the phenotypes observed in the *hh1* and *ptc* mutant lines result  
420 from single locus mutations.

421

422

### 423 **Inhibitor treatments**

424 GDC-0449 (Cayman Chemical; Ann Arbor, MI; Cat. No. 13613) and Cyclopamine (Cayman  
425 Chemical; Cat. No. 11321) were diluted in DMSO as 50 mM and 10 mM stocks, respectively.  
426 These stocks were diluted 1:2000 in 12 ppt filtered artificial sea water (FSW) to generate  
427 working solution: 25  $\mu$ M GDC-0449 and 5  $\mu$ M Cyclopamine. 1:2000 diluted 100% DMSO (final  
428 0.05%) was applied as a control. All treatments were protected from light, incubated at 24 °C,  
429 and replaced with fresh working solutions every day.

430

431

### 432 **Imaging and quantification**

433 For confocal imaging, we used a Leica TCS Sp5 Confocal Laser Scanning Microscope or a Nikon  
434 3PO Spinning Disk Confocal System. Bright field images were acquired using a Leica MZ 16 F  
435 stereoscope equipped with QICAM Fast 1394 camera (Qimaging; Surrey, BC, Canada). The  
436 brightness and contrast of images were adjusted by Fiji, and the PGC number of individual  
437 polyp was manually quantified by the Cell Counter Macro or automatically by blurring and  
438 masking the *Vasa2* signal to find the cluster and 3D peak finding of the DAPI nuclei within the  
439 cluster (<http://github.com/jouyun/smc-macros>). Serial z section images of *N. vectensis*  
440 pharyngeal structures were reconstructed as a 3D movie (Mov. S1) by Imaris 8.3 (Bitplane,  
441 Concord, MA). Figures of this report were generated using Adobe Illustrator 2019.

442

443

### 444 **Acknowledgements**

445 The authors would like to thank Gibson lab members for their suggestions and critical readings  
446 of the manuscript. Additionally, we thank the Stowers Institute Core Technology Centers, in  
447 particular Aquatics for *Nematostella* husbandry, Molecular Biology for sequencing and  
448 genotyping, and Histology for help with histological sectioning. This work was funded in its  
449 entirety by the Stowers Institute for Medical Research.

450

451



## 452 References

- 453 Adamska, M. *et al.* (2007) 'The evolutionary origin of hedgehog proteins', *Current Biology*,  
454 17(19), pp. R836–R837. doi: <https://doi.org/10.1016/j.cub.2007.08.010>.
- 455 Alcedo, J. *et al.* (1996) 'The *Drosophila* smoothed gene encodes a seven-pass membrane  
456 protein, a putative receptor for the hedgehog signal.', *Cell*, 86(2), pp. 221–232. doi:  
457 10.1016/s0092-8674(00)80094-x.
- 458 Bangs, F. and Anderson, K. V (2017) 'Primary Cilia and Mammalian Hedgehog Signaling.', *Cold  
459 Spring Harbor Perspectives in Biology*, 9(5). doi: 10.1101/cshperspect.a028175.
- 460 Briscoe, J. and Théron, P. P. (2013) 'The mechanisms of Hedgehog signalling and its roles in  
461 development and disease', *Nature Reviews Molecular Cell Biology*, 14, p. 416. doi:  
462 10.1038/nrm3598.
- 463 Burton, P. M. and Finnerty, J. R. (2009) 'Conserved and novel gene expression between  
464 regeneration and asexual fission in *Nematostella vectensis*.' , *Development Genes and Evolution*,  
465 219(2), pp. 79–87. doi: 10.1007/s00427-009-0271-2.
- 466 Chatfield, J. *et al.* (2014) 'Stochastic specification of primordial germ cells from mesoderm  
467 precursors in axolotl embryos.', *Development*, 141(12), pp. 2429–2440. doi:  
468 10.1242/dev.105346.
- 469 Extavour, C. G. *et al.* (2005) 'vasa and nanos expression patterns in a sea anemone and the  
470 evolution of bilaterian germ cell specification mechanisms', *Evolution & Development*, 7(3), pp.  
471 201–215. doi: 10.1111/j.1525-142X.2005.05023.x.
- 472 Extavour, G. C. and Akam, M. (2003) 'Mechanisms of germ cell specification across the  
473 metazoans: epigenesis and preformation', *Development*, 130(24), pp. 5869–5884. doi:  
474 10.1242/dev.00804.
- 475 Forbes, A. J. *et al.* (1993) 'Genetic analysis of hedgehog signalling in the *Drosophila* embryo.',  
476 *Development Supplement.*, pp. 115–124.
- 477 Frank, P. and Bleakney, S. (1976) 'Histology and sexual reproduction of the anemone  
478 *Nematostella vectensis* Stephenson 1935', *Journal of Natural History*, 10(4), pp. 441–449.
- 479 Fritzenwanker, J. H. *et al.* (2007) 'Early development and axis specification in the sea anemone  
480 *Nematostella vectensis*', *Developmental Biology*, 310(2), pp. 264–279. doi:  
481 10.1016/j.ydbio.2007.07.029.
- 482 Genikhovich, G. *et al.* (2015) 'Axis Patterning by BMPs: Cnidarian Network Reveals Evolutionary  
483 Constraints', *Cell Reports*, 10(10), pp. 1646–1654. doi: 10.1016/j.celrep.2015.02.035.
- 484 Genikhovich, G. and Technau, U. (2009) 'Anti-acetylated tubulin antibody staining and  
485 phalloidin staining in the starlet sea anemone *nematostella vectensis*', *Cold Spring Harbor  
486 Protocols*, 4(9), pp. 1–5. doi: 10.1101/pdb.prot5283.

- 487 Hand, C. and Uhlinger, K. R. (1995) 'Asexual Reproduction by Transverse Fission and Some  
488 Anomalies in the Sea Anemone *Nematostella vectensis*', *Invertebrate Biology*, 114(1), pp. 9–18.  
489 doi: 10.2307/3226948.
- 490 He, S. *et al.* (2018) 'An axial Hox code controls tissue segmentation and body patterning in  
491 *Nematostella vectensis*', *Science*, 361(6409), pp. 1377–1380. doi: 10.1126/science.aar8384.
- 492 van den Heuvel, M. and Ingham, P. W. (1996) 'smoothed encodes a receptor-like serpentine  
493 protein required for hedgehog signalling.', *Nature*, 382(6591), pp. 547–551. doi:  
494 10.1038/382547a0.
- 495 Ikmi, A. *et al.* (2014) 'TALEN and CRISPR/Cas9-mediated genome editing in the early-branching  
496 metazoan *Nematostella vectensis*', *Nature Communications*, 5. doi: 10.1038/ncomms6486.
- 497 Irie, N., Tang, W. W. C. and Azim Surani, M. (2014) 'Germ cell specification and pluripotency in  
498 mammals: a perspective from early embryogenesis', *Reproductive Medicine and Biology*, 13(4),  
499 pp. 203–215. doi: 10.1007/s12522-014-0184-2.
- 500 Jahnel, S. M., Walzl, M. and Technau, U. (2014) 'Development and epithelial organisation of  
501 muscle cells in the sea anemone *Nematostella vectensis*.' *Frontiers in Zoology*, 11(44). doi:  
502 10.1186/1742-9994-11-44.
- 503 Johnson, R. L., Milenkovic, L. and Scott, M. P. (2000) 'In vivo functions of the Patched protein:  
504 Requirement of the C terminus for target gene inactivation but not Hedgehog sequestration',  
505 *Molecular Cell*, 6(2), pp. 467–478. doi: 10.1016/S1097-2765(00)00045-9.
- 506 Juliano, C. E., Swartz, Z. S. and Wessel, G. M. (2010) 'A conserved germline multipotency  
507 program', *Development*, 137(24), pp. 4113–4126.
- 508 Kallergi, G. *et al.* (2011) 'Epithelial to mesenchymal transition markers expressed in circulating  
509 tumour cells of early and metastatic breast cancer patients', *Breast Cancer Research*, 13(3), p.  
510 R59. doi: 10.1186/bcr2896.
- 511 Karabulut, A. *et al.* (2019) 'Electroporation of short hairpin RNAs for rapid and efficient gene  
512 knockdown in the starlet sea anemone, *Nematostella vectensis*', *Developmental Biology*,  
513 448(1), pp. 7–15. doi: 10.1016/j.ydbio.2019.01.005.
- 514 King, N. *et al.* (2008) 'The genome of the choanoflagellate *Monosiga brevicollis* and the origin of  
515 metazoans', *Nature*, 451(7180), p. 783-788. doi: 10.1038/nature06617.
- 516 Kraus, Y. *et al.* (2016) 'Pre-bilaterian origin of the blastoporal axial organizer', *Nature*  
517 *Communications*, 7. doi: 10.1038/ncomms11694.
- 518 Lawson, K. A. *et al.* (1999) 'Bmp4 is required for the generation of primordial germ cells in the  
519 mouse embryo', *Genes and Development*, 13(4), pp. 424–436.
- 520 Lotan, T. *et al.* (2014) 'Evolutionary conservation of the mature oocyte proteome', *EuPA Open*  
521 *Proteomics*, 3, pp. 27–36. doi: 10.1016/j.euprot.2014.01.003.
- 522 Magnúsdóttir, E. and Surani, M. A. (2014) 'How to make a primordial germ cell', *Development*,  
523 141(2), pp. 245–252. doi: 10.1242/dev.098269.
- 524 Matus, D. Q. *et al.* (2008) 'The Hedgehog gene family of the cnidarian, *Nematostella vectensis*,

- 525 and implications for understanding metazoan Hedgehog pathway evolution', *Developmental*  
526 *Biology*, 313(2), pp. 501–518. doi: 10.1016/j.ydbio.2007.09.032.
- 527 McCabe, J. M. and Leahy, D. J. (2015) 'Smoothed goes molecular: New pieces in the  
528 hedgehog signaling puzzle', *Journal of Biological Chemistry*, 290(6), pp. 3500–3507. doi:  
529 10.1074/jbc.R114.617936.
- 530 Nakamura, T. and Extavour, C. G. (2016) 'The transcriptional repressor Blimp-1 acts  
531 downstream of BMP signaling to generate primordial germ cells in the cricket *Gryllus*  
532 *bimaculatus*.', *Development*, 143(2), pp. 255–263. doi: 10.1242/dev.127563.
- 533 Newmark, P. A. *et al.* (2003) 'Ingestion of bacterially expressed double-stranded RNA inhibits  
534 gene expression in planarians.', *Proceedings of the National Academy of Sciences of the United*  
535 *States of America*. United States, 100 Suppl, pp. 11861–11865. doi: 10.1073/pnas.1834205100.
- 536 Nieuwkoop, P. D. and Sutasurya, L. A. (1979) *Primordial Germ Cells in the Chordates:*  
537 *Embryogenesis and phylogenesis*. Cambridge University Press.
- 538 Nieuwkoop, P. D. and Sutasurya, L. A. (1981) *Primordial Germ Cells in the Invertebrates: From*  
539 *epigenesis to preformation*. Cambridge University Press.
- 540 Praher, D. *et al.* (2017) 'Characterization of the piRNA pathway during development of the sea  
541 anemone *Nematostella vectensis*', *RNA Biology*, 14(12), pp. 1–15. doi:  
542 10.1080/15476286.2017.1349048.
- 543 Putnam, N. H. *et al.* (2007) 'Sea Anemone Genome Reveals Ancestral Eumetazoan Gene  
544 Repertoire and Genomic Organization', *Science*. American Association for the Advancement of  
545 Science, 317(5834), pp. 86–94. doi: 10.1126/science.1139158.
- 546 Renfer, E. and Technau, U. (2017) 'Meganuclease-assisted generation of stable transgenics in  
547 the sea anemone *Nematostella vectensis*.', *Nature Protocols*, 12(9), pp. 1844–1854. doi:  
548 10.1038/nprot.2017.075.
- 549 Russell, J. J. *et al.* (2017) 'Non-model model organisms', *BMC biology*. BioMed Central, 15(1), p.  
550 55. doi: 10.1186/s12915-017-0391-5.
- 551 Scarpa, E. and Mayor, R. (2016) 'Collective cell migration in development', *Journal of Cell*  
552 *Biology*, 212(2), pp. 143–155. doi: 10.1083/jcb.201508047.
- 553 Seervai, R. and Wessel, G. M. (2013) 'Lessons for inductive germline determination', *Molecular*  
554 *reproduction and Development*, 80(8), pp. 590–609. doi: 10.1002/mrd.22151.
- 555 Sharpe, H. J. *et al.* (2015) 'Regulation of the oncoprotein Smoothed by small molecules',  
556 *Nature Chemical Biology*, 11, p. 246. doi: 10.1038/nchembio.1776.
- 557 Solana, J. (2013) 'Closing the circle of germline and stem cells: The Primordial Stem Cell  
558 hypothesis', *EvoDevo*, 4(1). doi: 10.1186/2041-9139-4-2.
- 559 Stefanik, D. J., Friedman, L. E. and Finnerty, J. R. (2013) 'Collecting, rearing, spawning and  
560 inducing regeneration of the starlet sea anemone, *Nematostella vectensis*', *Nature Protocols*,  
561 8(5), pp. 892–899. doi: 10.1038/nprot.2012.151.
- 562 Steinmetz, P. R. H. *et al.* (2017) 'Gut-like ectodermal tissue in a sea anemone challenges germ

- 563 layer homology', *Nature Ecology and Evolution*, 1(10), pp. 1535–1542. doi: 10.1038/s41559-  
564 017-0285-5.
- 565 Stone, D. M. *et al.* (1996) 'The tumour-suppressor gene patched encodes a candidate receptor  
566 for Sonic hedgehog.', *Nature*, 384(6605), pp. 129–134. doi: 10.1038/384129a0.
- 567 Strome, S. and Wood, W. B. (1982) 'Immunofluorescence visualization of germ-line-specific  
568 cytoplasmic granules in embryos, larvae, and adults of *Caenorhabditis elegans*', *Proceedings of*  
569 *National Academy of Sciences*, 79(5), pp. 1558–1562.
- 570 Technau, U. and Steele, R. E. (2011) 'Evolutionary crossroads in developmental biology:  
571 Cnidaria', *Development*, 138(8), pp. 1447–1458. doi: 10.1242/dev.048959.
- 572 Wan, P. *et al.* (2018) 'Evaluation of seven optical clearing methods in mouse brain',  
573 *Neurophotonics*, 5(3), pp. 35007. doi: 10.1117/1.NPh.5.3.035007.
- 574 Williams, R. B. (1975) 'A redescription of the brackish-water sea anemone *nematostella*  
575 *vectensis stephenson*, with an appraisal of congeneric species', *Journal of Natural History*, 9(1),  
576 pp. 51–64. doi: 10.1080/00222937500770051.
- 577 Williams, R. B. (1979) 'Studies on the nematosomes of *nematostella vectensis stephenson*  
578 (Coelenterata: Actiniaria)', *Journal of Natural History*, 13(1), pp. 69–80. doi:  
579 10.1080/00222937900770061.
- 580 Williamson, A. and Lehmann, R. (1996) 'Germ Cell Development in *Drosophila*', *Annual Review*  
581 *of Cell and Developmental Biology*, 12(1), pp. 365–391. doi: 10.1146/annurev.cellbio.12.1.365.
- 582 Wylie, C. (1999) 'Germ Cells', *Cell*, 96(2), pp. 165–174. doi: 10.1016/S0092-8674(00)80557-7.
- 583 Yang, J. *et al.* (2004) 'Twist, a Master Regulator of Morphogenesis, Plays an Essential Role in  
584 Tumor Metastasis', *Cell*, 117(7), pp. 927–939. doi: <https://doi.org/10.1016/j.cell.2004.06.006>.
- 585 Yoon, C., Kawakami, K. and Hopkins, N. (1997) 'Zebrafish *vasa* homologue RNA is localized to  
586 the cleavage planes of 2- and 4-cell-stage embryos and is expressed in the primordial germ  
587 cells', *Development*, 124(16), pp. 3157–3165.
- 588

589 **Figures**

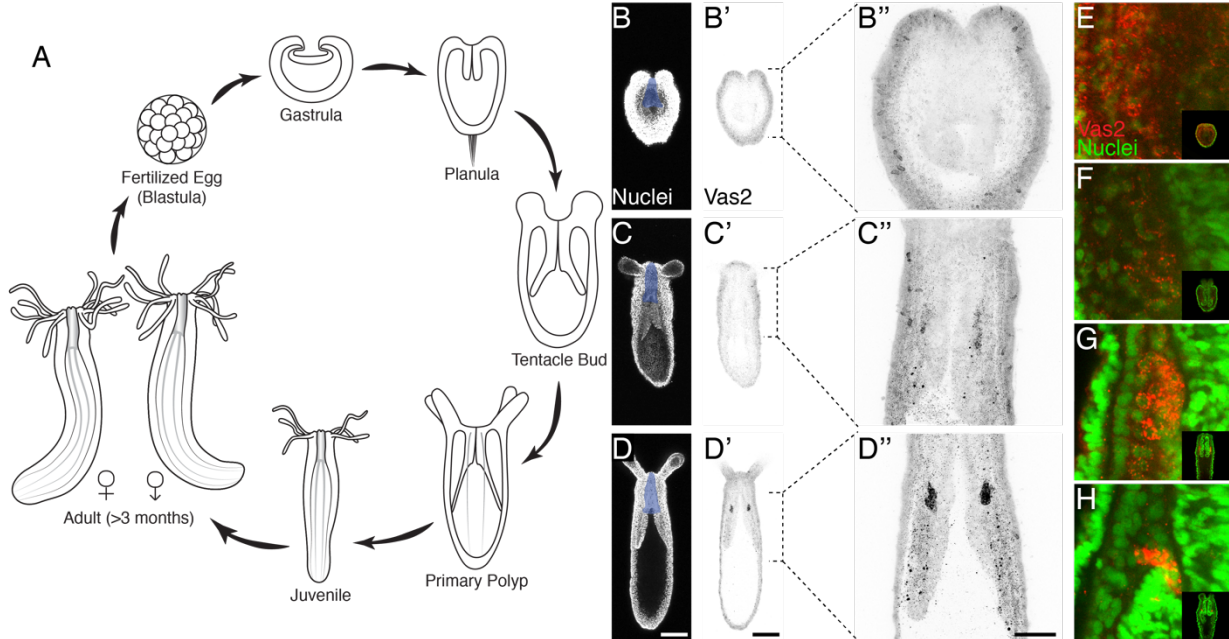

590

591 **Fig. 1. Putative *Nematostella* PGCs clusters are specified during metamorphosis.** (A) Diagram  
592 depicting the *Nematostella* life cycle. Nuclei staining with Hoechst (B-D) and Vas2  
593 immunostaining (B'-D' and B''-D'') during tentacle bud to primary polyp metamorphosis. Vas2  
594 expression is gradually enriched at two cell clusters next to the pharynx (shaded blue), showing  
595 PGC specification in certain endomesodermal cells. (E-H) The maternally-deposited Vas2 protein  
596 (red) forms granules around the nuclei of endomesodermal cells (green), which diminish as the  
597 PGC clusters form. Scale bar = 100 μm in D-D'; 50 μm in D''; B-D' are at the same scale; B''-D''  
598 are at the same scale; E-H are at the same scale.

599

600

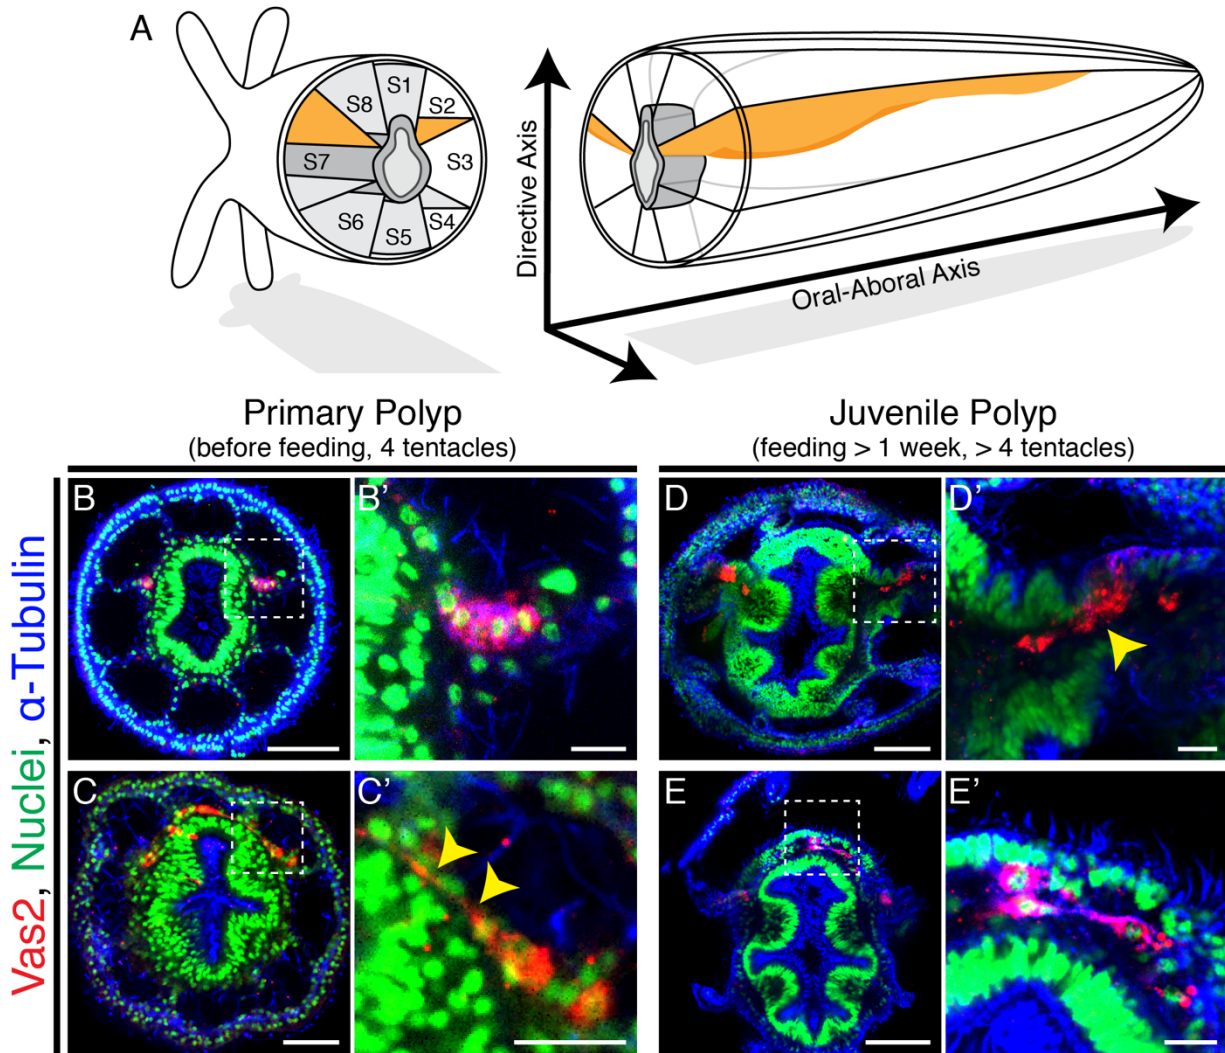

601

602 **Fig. 2. Putative *Nematostella* PGCs delaminate through epithelial-mesenchymal transition**

603 **(EMT) and appear to migrate to non-primary mesenteries. (A)** Schematic diagram of

604 *Nematostella* polyp anatomy depicts the pharynx and mesentery arrangements at the

605 pharyngeal level. The eight mesenteries (two primary mesenteries in *orange* and six non-primary

606 mesenteries in *light gray*) harbor gonad epithelium, muscle and digestive tissue. The internal

607 structures of *Nematostella* are arrayed around the pharynx (*dark gray*). The *directive* and *Oral-*

608 *Aboral* axes are indicated, segment nomenclatures follow He et al. (2018). **(B-B')** Paired clusters

609 of putative PGCs labeled by Vas2 immunofluorescence (*red*) initially exhibit epithelial

610 characteristics. **(C-C')** Putative PGCs from >10 dpf primary polyps appear to stretch their cell bodies

611 basally (*yellow arrowheads*). **(D-D')** Following nutrient intake, putative PGCs delaminate into the

612 mesoglea through an apparent EMT (*yellow arrowhead*). **(E-E')** In the mesoglea, these Vas2+ cells

613 exhibit fibroblast-like morphology and are detected between mesenteries at the level of the  
614 aboral pharynx. Scale bar = 10  $\mu\text{m}$  in **B'**, **C'**, **D'**, **E'**; 20  $\mu\text{m}$  in **C**; 50  $\mu\text{m}$  in **B**, **D**, **E**.  
615

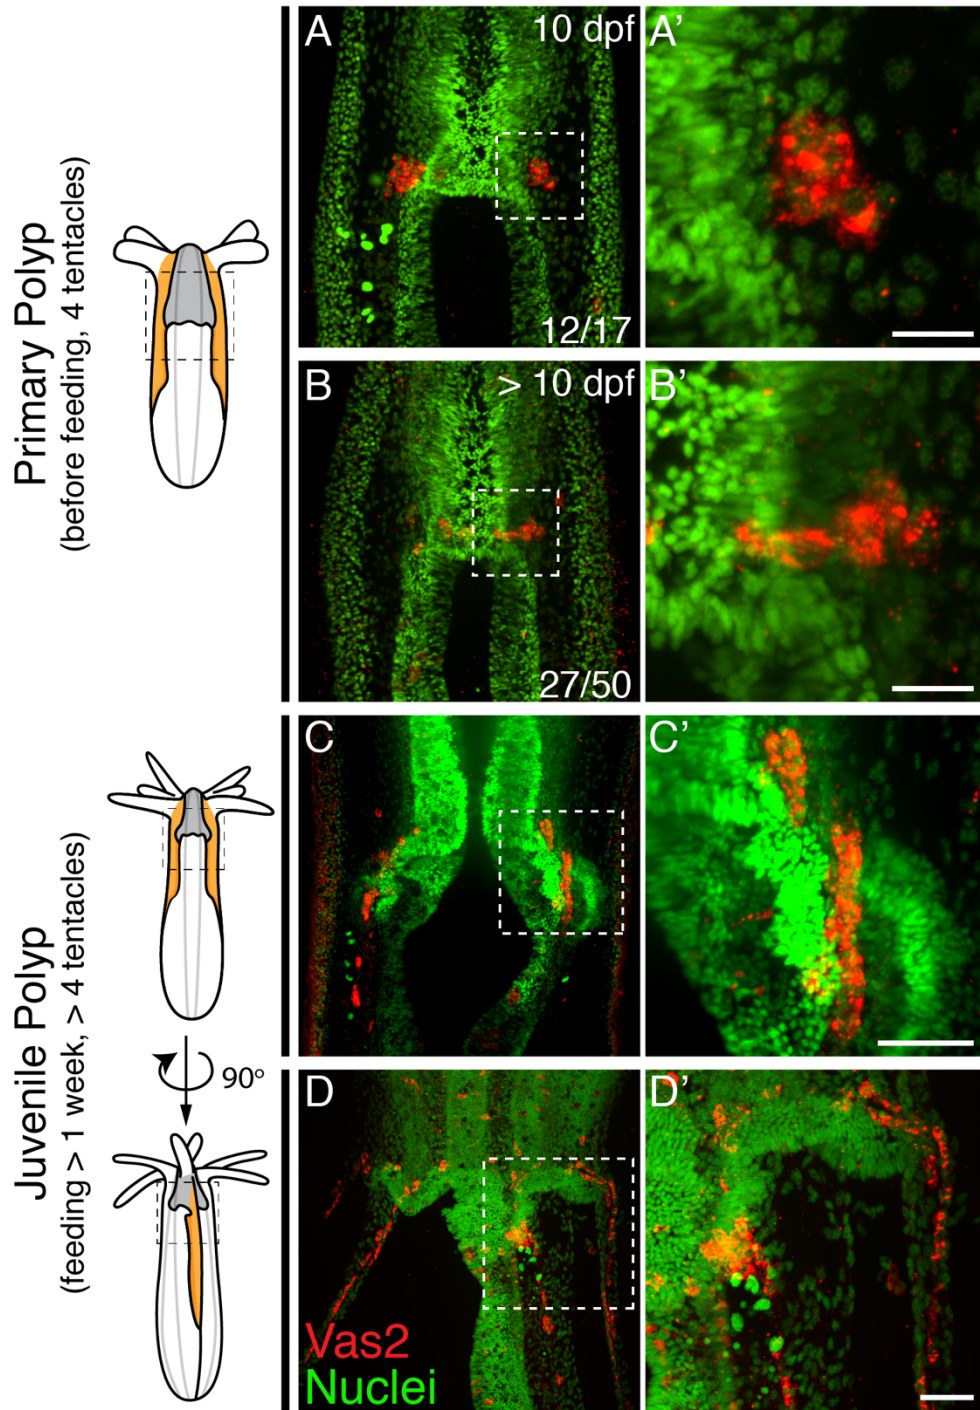

616

617 **Fig. 3. *Nematostella* PGCs migrate aborally to the gonad rudiments during juvenile stage. (A-**  
618 **A')** The majority of young primary polyps ( $\leq 10$  dpf) exhibit two PGC clusters (Vas2+, red) in close  
619 proximity to the developing pharynx. (B-B') In more mature primary polyps ( $> 10$  dpf), some  
620 PGCs elongate and localize between mesenteries. (C-C') Following feeding, putative PGCs  
621 spread aborally into gonad rudiments. (D-D') A juvenile polyp viewed 90 degrees from the



622 orientation of **C**, showing aborally migrating PGCs in non-primary mesenteries. Scale bar = 10  
623  $\mu\text{m}$  in **A'**, **B'**; 20  $\mu\text{m}$  in **C'**, **D'**.

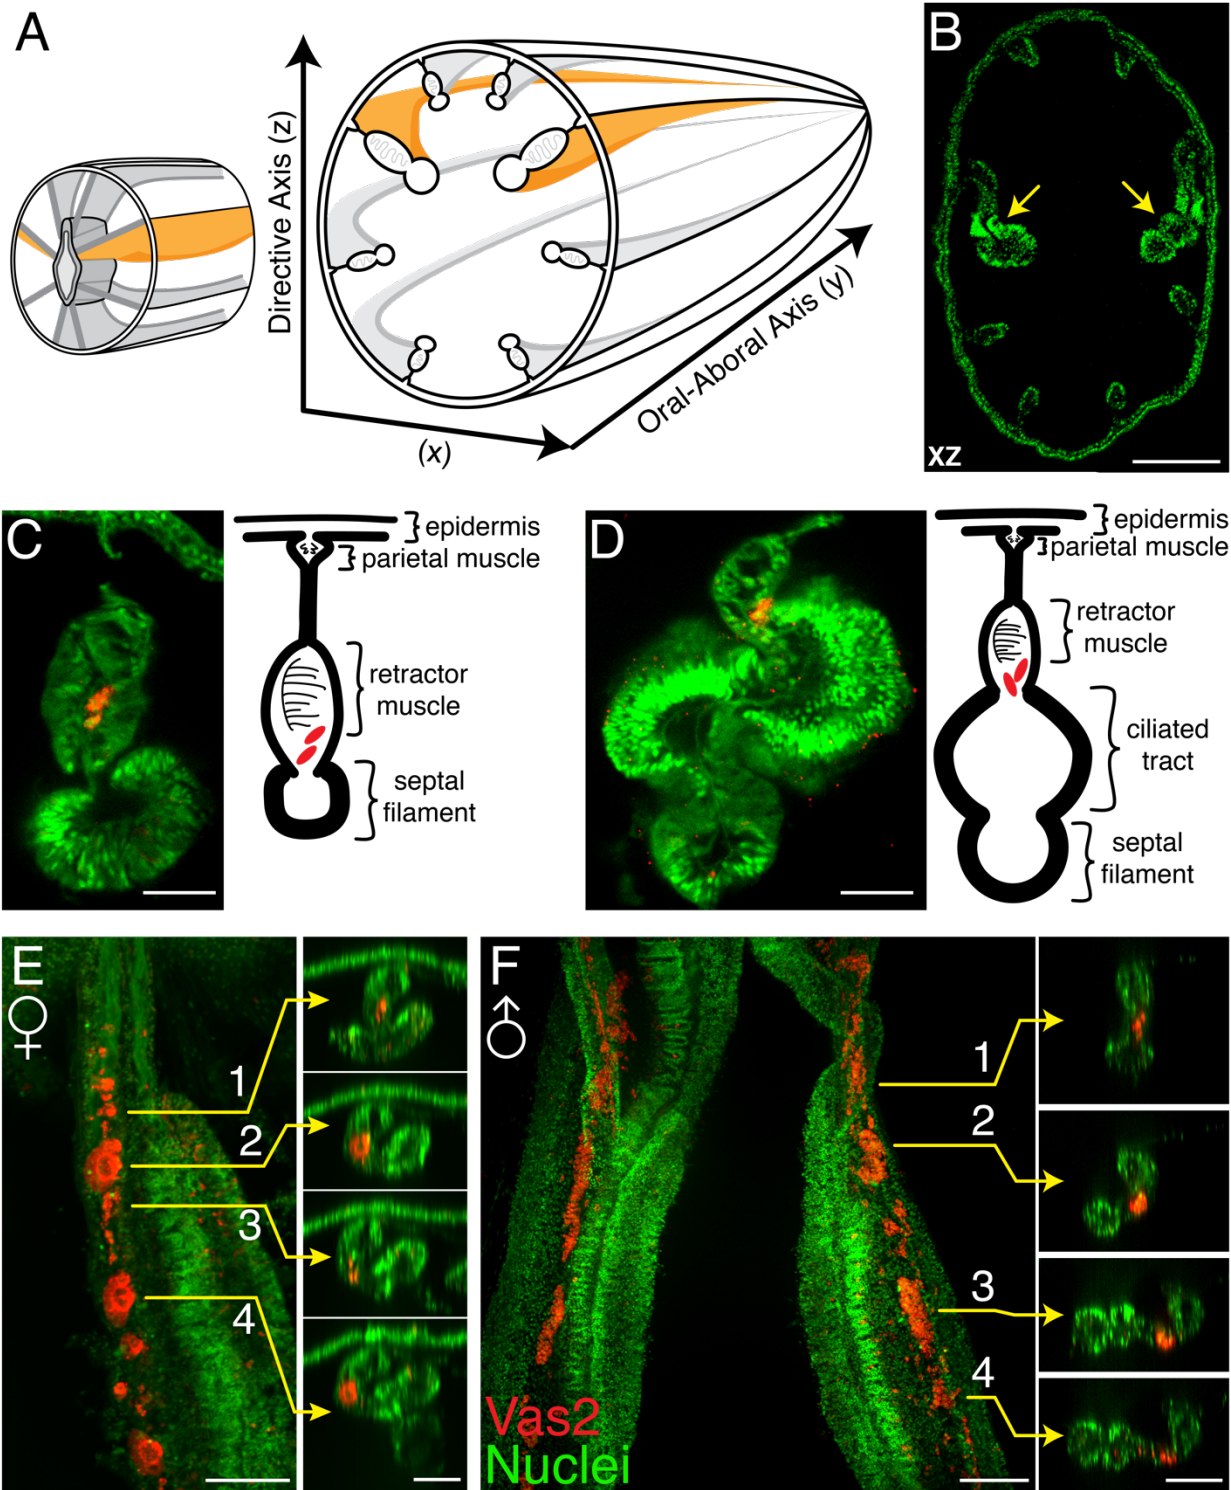

624

625 **Fig. 4. Vas2+ germ cells in juvenile gonad rudiments. (A)** Schematic diagram of *Nematostella*

626 polyp anatomy depicts the gametogenic mesenteries at the mid-body level. **(B)** A mid-body level

627 cross section through a juvenile polyp, note the enlarged primary mesenteries (*yellow arrows*).

628 Nuclei are counter stained by DAPI (*green*). **(C-D)** Representative images of maturing mesenteries  
629 with corresponding schematic diagrams. Putative PGCs are labeled by Vas2 immunofluorescence  
630 in *red*. **(E)** Whole-mount juvenile female mesentery shows Vas2-labeled putative PGCs and germ  
631 cells in close proximity (*red*) suggesting maturing oocytes originate from the continuous PGC  
632 lineage. **(F)** Whole-mount juvenile male mesentery shows Vas2-labeled putative PGC and GC  
633 populations, including the rudimentary sperm cysts. Insets 1-4 of **E** and **F** are xz plane views at  
634 the indicated levels. Scale bar = 100  $\mu\text{m}$  in **B**; 20  $\mu\text{m}$  in **C-F**.  
635  
636

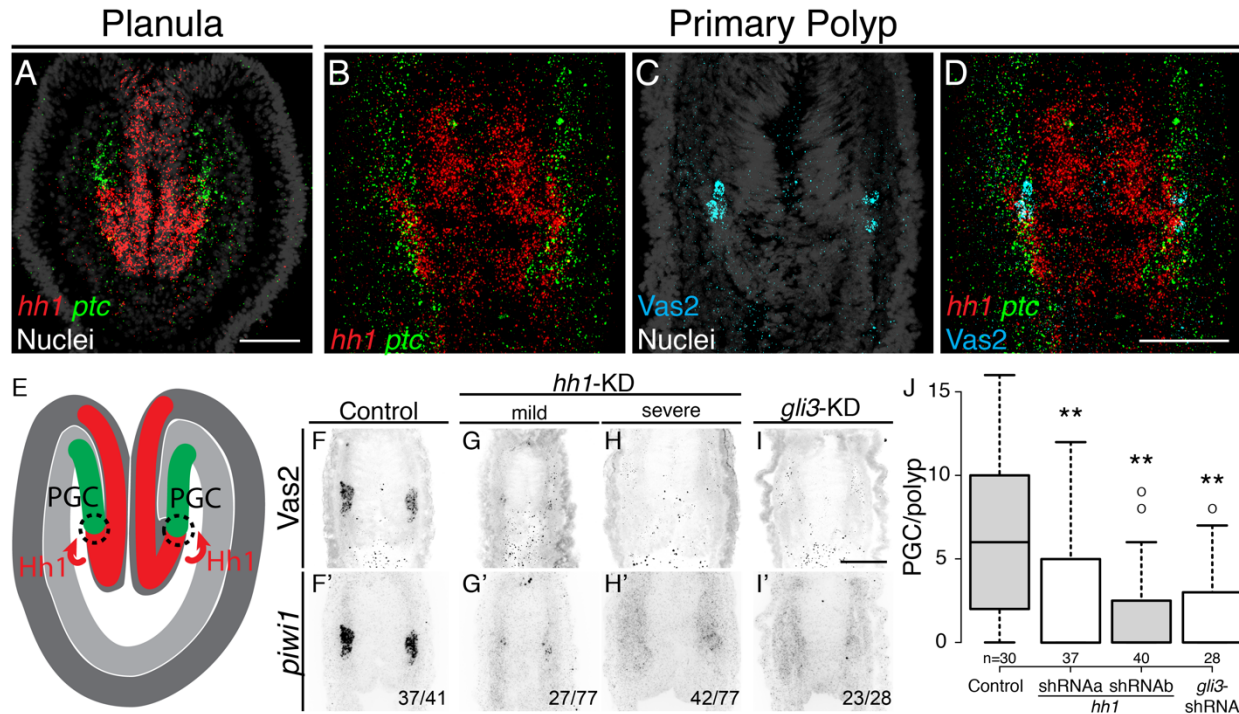

637

638 **Fig. 5. Hh signaling is required for *Nematostella* PGC formation.** (A) Prior to PGC specification in  
 639 planula larvae, *hh1* (red) and *ptc* (green) are expressed in pharyngeal ectoderm and  
 640 endomesoderm, respectively. (B-D) In primary polyps, PGC clusters (cyan) are specified within  
 641 the *ptc* expression domain, neighboring to the *hh1* domain. (E) Diagram depicting our working  
 642 hypothesis about how Hh regulates PGC formation. (F-I') PGC formation—indicated by Vas2  
 643 immunostaining and *piwi1* fluorescent *in situ* hybridization—is impaired by *hh1* or *gli3* shRNA  
 644 knockdown. (J) PGC numbers were significantly reduced following *hh1* or *gli3* knockdown with  
 645 shRNA. \*\* represents  $p < 0.01$  of two-tailed t-test by comparing with controls (mock-shRNA  
 646 injection). Scale bar = 50  $\mu\text{m}$  in A, D, I; B-D are at the same scale; F-I' are at the same scale.

647

648

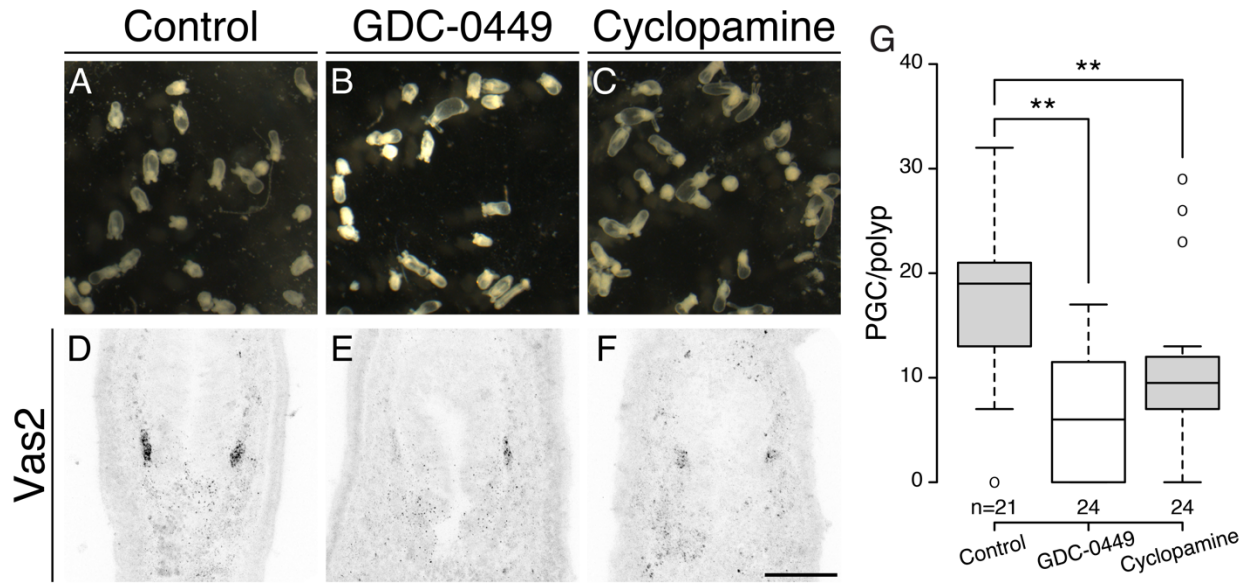

649

650 **Fig. 6. Inhibiting Hh signaling by GDC-0449 or Cyclopamine impairs PGC formation.** (A-C) The  
651 majority of primary polyps do not show visible developmental defects after treatment with GDC-  
652 0449 or Cyclopamine from the gastrula stage onward. (D-G) Primary polyps treated with GDC-  
653 0449 or Cyclopamine formed fewer PGCs than controls. \*\* represents  $p < 0.01$  of two-tailed t-  
654 test by comparing with control treatment. Scale bar = 50  $\mu\text{m}$  in F. A-C are at the same scale; E-F  
655 are at the same scale.

656

657

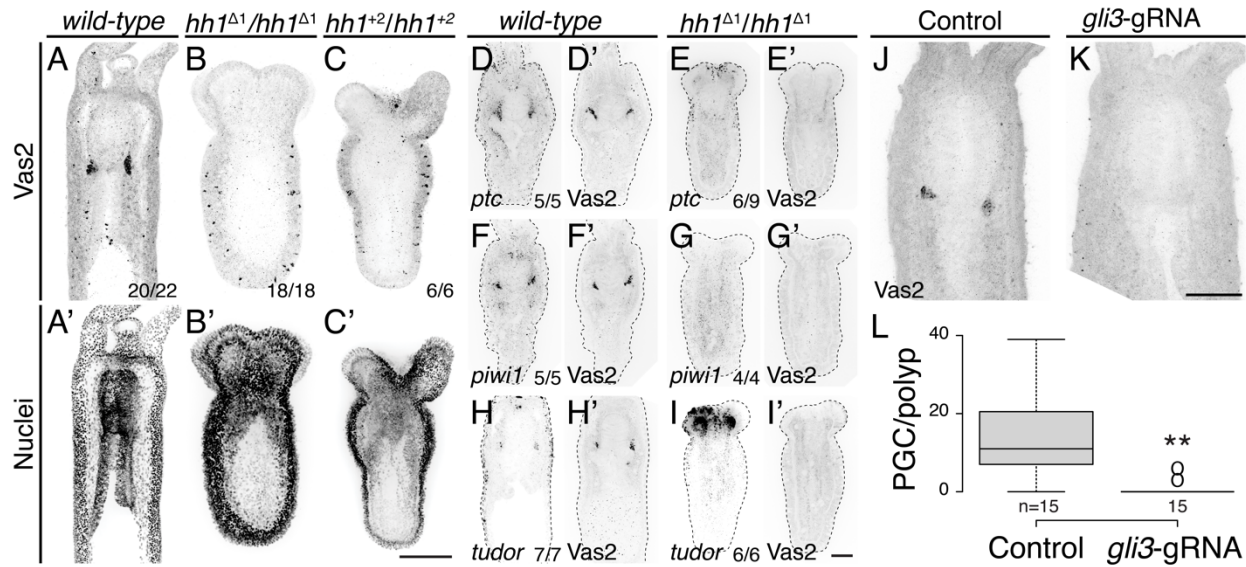

658

659 **Fig. 7. PGC clusters do not form in *hh1* or *gli3* knockout mutants. (A-C')** *hh1* homozygous  
660 mutant polyps exhibit a shorter body column and pronounced tentacle defects compared to *wild-*  
661 *type* siblings. Additionally, no *Vas2*+ PGC clusters were detected in *hh1* homozygous knockout  
662 polyps. (D-E') *hh1* mutant polyps show reduced *ptc* expression in the endomesoderm. (F-I') *hh1*  
663 mutant polyps lose other PGC markers, including *piwi1* and *tudor*. (J-L) Double *gli3* gRNA injected  
664 primary polyps showed reduced PGC numbers, as observed in *gli3* shRNA knockdown. A-C' are  
665 multiple-focal planes projections. D-I' are from single-focal plane at the primary mesentery level.  
666 Scale bar = 50  $\mu$ m in C, I' and K; A-C' are at the same scale; E-I' are at the same scale; J and K are  
667 at the same scale.

668

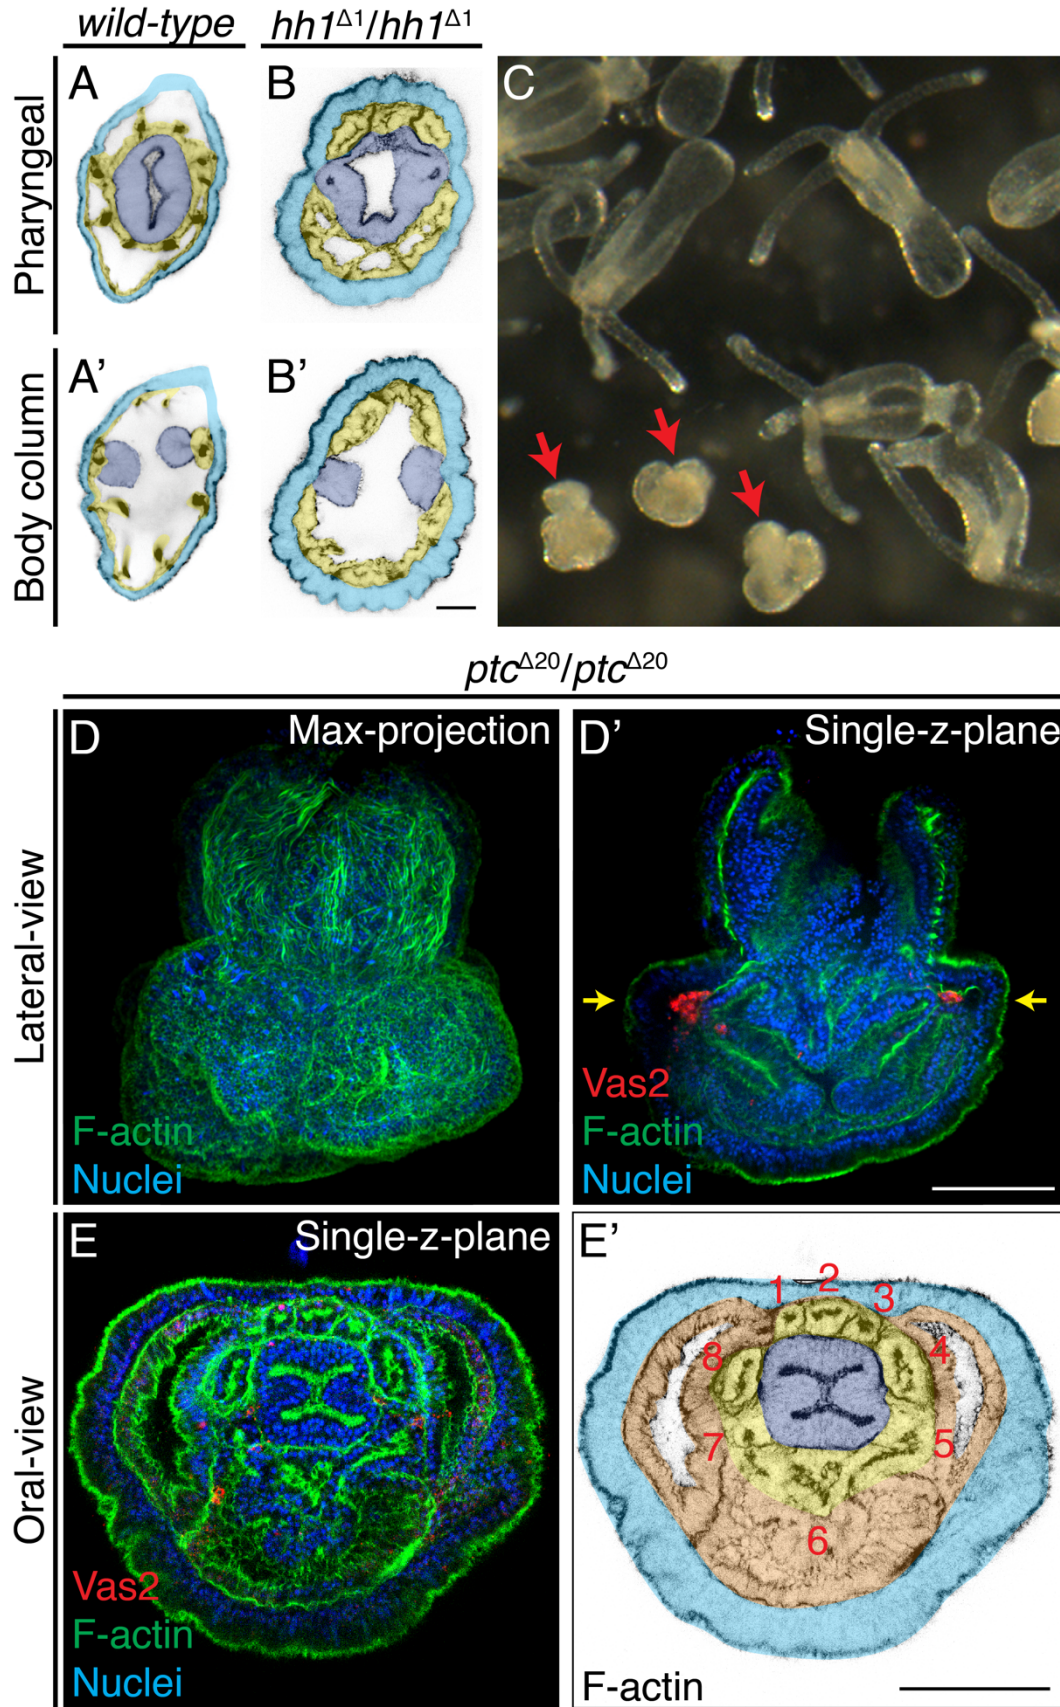

670 **Fig. 8. Patterning defects in *hh1* and *ptc* mutants. (A-B')** In addition to loss of putative PGCs, *hh1*  
671 mutant polyps show endomesodermal patterning defects. Parts of the pharyngeal ectoderm and  
672 septal filaments (*navy blue*) abnormally contact the outer epidermis (*azure blue*), without  
673 endomesoderm tissue in between (*yellow*). These contacts segregated the normally contiguous  
674 eight endomesodermal segments into blocks of three and five segments along the directive axis.  
675 **(C)** F2 progeny from a cross between *ptc*<sup>Δ2</sup>/+ heterozygous siblings. The abnormal mushroom-  
676 shaped polyps are indicated by *red* arrows. **(D-D')** At the primary polyp stage, homozygous *ptc*  
677 mutants lack the four primary tentacles and do not develop the normal polyp body plan. **(E-E')** A  
678 single false-colored focal plane taken at the level indicated by yellow arrows in **D'**. Despite  
679 significant morphological defects, *ptc* mutants animals develop a pharynx (*navy blue*), eight  
680 endomesodermal segments (*yellow*), body wall endomesoderm (*orange*) and putative PGC  
681 clusters (labeled by Vas2 immunofluorescence in *red* in **D'**). Scale bar = 20 μm in **B'**; 50 μm in **D'**  
682 and **E'**; **A-B'** are at the same scale; **D-D'** are at the same scale; **E-E'** are at the same scale.  
683



684 **Table S1.** Primer sets for cloning probe templates into pPR-T4P (gene-specific regions are  
685 underlined)  
686

| Target       | Sequence | Probe size (bp)                          |      |
|--------------|----------|------------------------------------------|------|
| <i>piwi1</i> | Forward  | <u>CATTACCATCCCGCGAGCCTACAACCAGGAGAG</u> | 1327 |
|              | Reverse  | <u>CCAATTCTACCCGCGTTGTGTTGATGCCCATAG</u> |      |
| <i>piwi2</i> | Forward  | <u>CATTACCATCCCGTGGGCGGTACTTCTACAACC</u> | 1367 |
|              | Reverse  | <u>CCAATTCTACCCGTGCCCTTGATAAGGAGCATC</u> |      |
| <i>vas2</i>  | Forward  | <u>CATTACCATCCCGTGAAGGGTCTCCAATTCCTG</u> | 1530 |
|              | Reverse  | <u>CCAATTCTACCCGTGTGCAGATTACAGCCAAGG</u> |      |
| <i>tudor</i> | Forward  | <u>CATTACCATCCCGGAACCTACTTGCTTCCGCAG</u> | 1450 |
|              | Reverse  | <u>CCAATTCTACCCGACGACTCGGTGTTCCCATAG</u> |      |
| <i>twist</i> | Forward  | <u>CATTACCATCCCGAAATCTCGGTGTCGGTCTTG</u> | 1020 |
|              | Reverse  | <u>CCAATTCTACCCGTATCGCAGCTTTGCTTTCAG</u> |      |
| <i>hh1</i>   | Forward  | <u>CATTACCATCCCGTTTCATTGGGAGCTAGTGGG</u> | 1327 |
|              | Reverse  | <u>CCAATTCTACCCGAAAGCGTGAATTGGGTCTTG</u> |      |
| <i>ptc</i>   | Forward  | <u>CATTACCATCCCGGATGTGCGTGTGTGGGATAG</u> | 1455 |
|              | Reverse  | <u>CCAATTCTACCCGACCGCGAGGTAATTGAACAC</u> |      |

687  
688  
689  
690

**Table S2.** shRNA sequences

| Target      | shRNA name         | Sequence             |
|-------------|--------------------|----------------------|
| <i>hh1</i>  | <i>hh1</i> -shRNAa | GGCTTGCTATAACACTGAT  |
| <i>hh1</i>  | <i>hh1</i> -shRNAb | GGCAGAGCTGTTGATATAA  |
| <i>gli3</i> | <i>gli3</i> -shRNA | GAGAAGAGGGATTTACAT   |
| <i>Gbx</i>  | <i>Gbx</i> -shRNAa | GCCAAGGTTAATAGATCCT  |
| <i>Gbx</i>  | <i>Gbx</i> -shRNAb | GGAAACGTGTACGATCACT  |
| <i>eGFP</i> | <i>eGFP</i> -shRNA | GACGTAAACGGCCACAAGTT |

691  
692  
693  
694

**Table S3.** gRNA sequence for CRISPR/Cas9 mutagenesis (PAM domains are underlined)

| Target      | gRNA name          | Sequence                |
|-------------|--------------------|-------------------------|
| <i>hh1</i>  | <i>hh1</i> -gRNAa  | GGGAGCTAGTGGGAGACCACAGG |
| <i>ptc</i>  | <i>ptc</i> -gRNAb  | AGAGGTGAAGGCCAGGACAGTGG |
| <i>gli3</i> | <i>gli3</i> -gRNAa | AGTGAGGTGGCTGTGGATGGTGG |
| <i>gli3</i> | <i>gli3</i> -gRNAb | GCGGCATGACCAGGAGGAGGTGG |

695 Note: *ptc*-gRNAb, *gli3*-gRNAa and *gli3*-gRNAb target the opposite strand of the gene locus  
696  
697  
698

699 **Table S4.** Mutant allele descriptions

700

| Allele                    | gRNA used         | Insertion/deletion at gRNA target domain                                                             | Mutant allele product  |
|---------------------------|-------------------|------------------------------------------------------------------------------------------------------|------------------------|
| <i>hh1</i> <sup>Δ1</sup>  | <i>hh1</i> -gRNAa | GGGAGCTAGTGGGAGACC <u>C</u> ACAGG: point deletion at underlined "C"                                  | minus 1nt frame shift  |
| <i>hh1</i> <sup>+2</sup>  | <i>hh1</i> -gRNAa | GGGAGCTAGTGGGAGACCACAGG: the underlined cytosine is replaced with "AAA"                              | plus 2nt frame shift   |
| <i>ptc</i> <sup>Δ2</sup>  | <i>ptc</i> -gRNAb | CCACTG <u>T</u> CCTGGCCTTACCTCT the underlined 5nt is replaced with "AGA"                            | minus 2nt frame shift  |
| <i>ptc</i> <sup>Δ20</sup> | <i>ptc</i> -gRNAb | CAGTAGGGTCACGGATGAAGACTCCACTG <u>T</u> CCTGGCCTT CACCTCT: the underlined 23nt is replaced with "TCA" | minus 20nt frame shift |

701

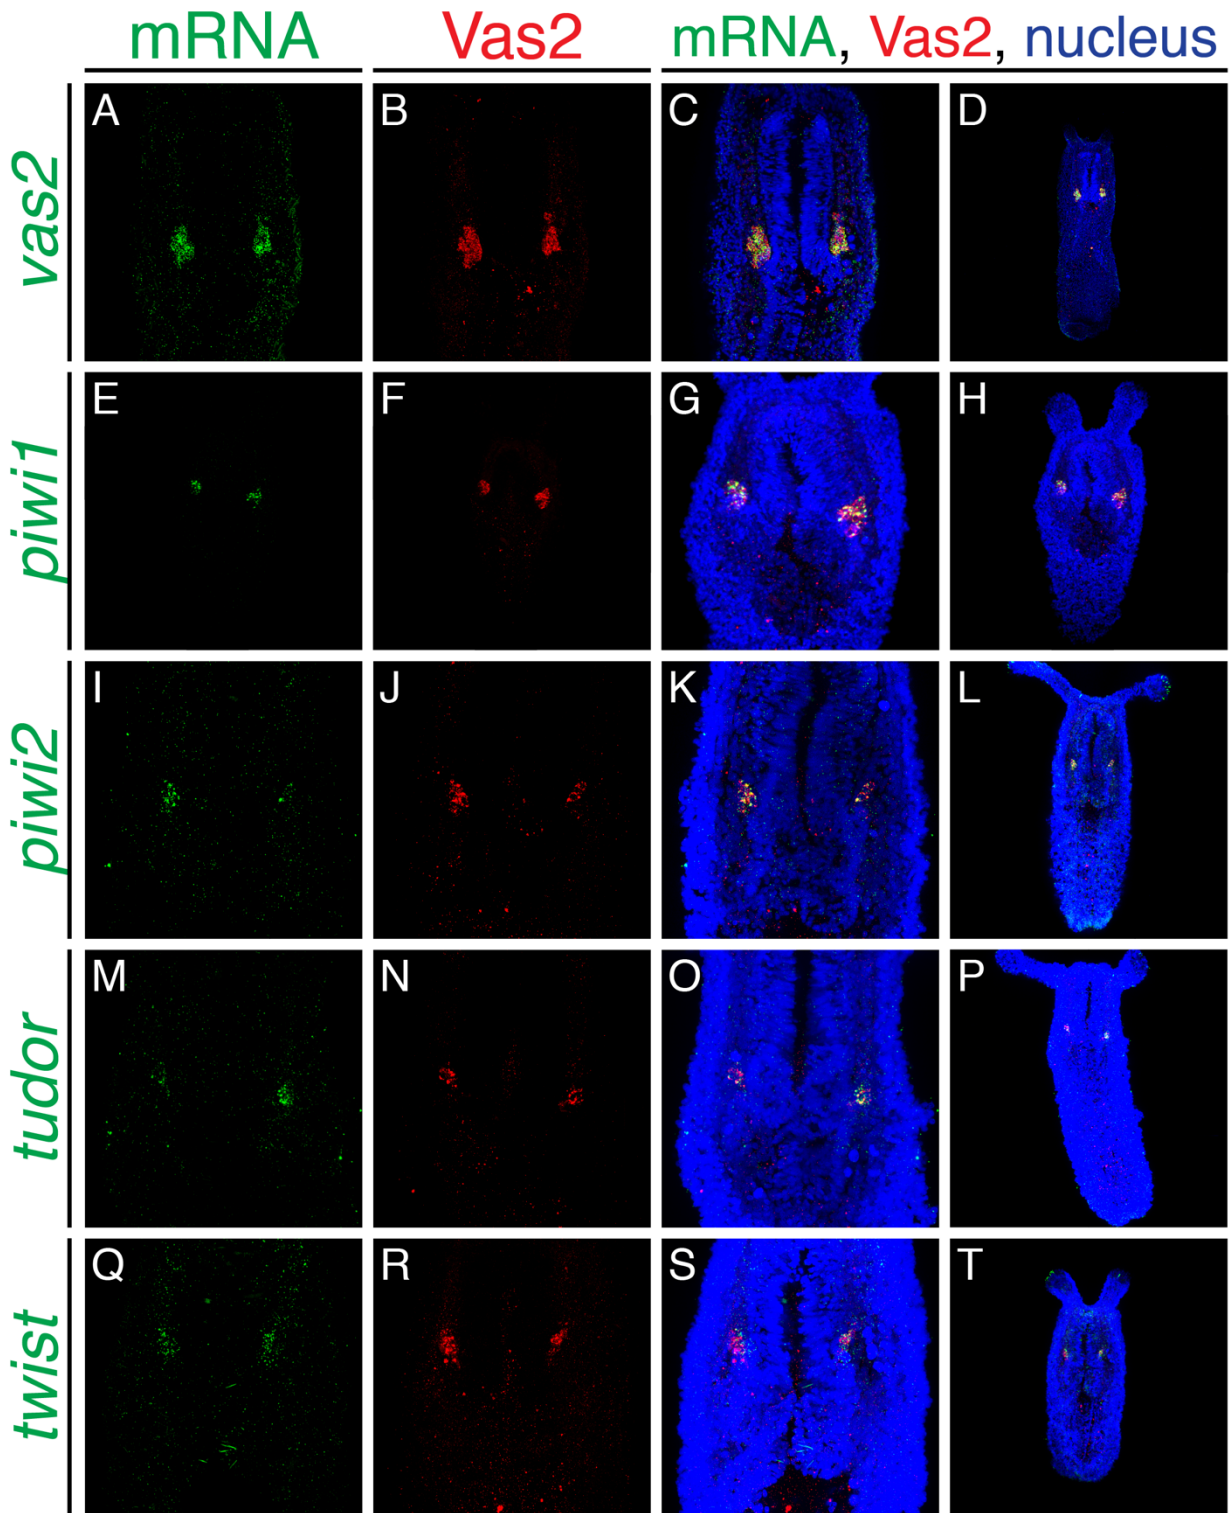

**Fig. S1. Conserved germline and EMT-related genes are expressed in putative PGC clusters.**

Fluorescent *in situ* hybridization (FISH, *green*) of *vas2* (**A**), *piwi1* (**E**), *piwi2* (**I**), *tudor* (**M**) and *twist* (**Q**) show enhanced expression within PGC cell clusters (Vas2-immunofluorescence, *red*).

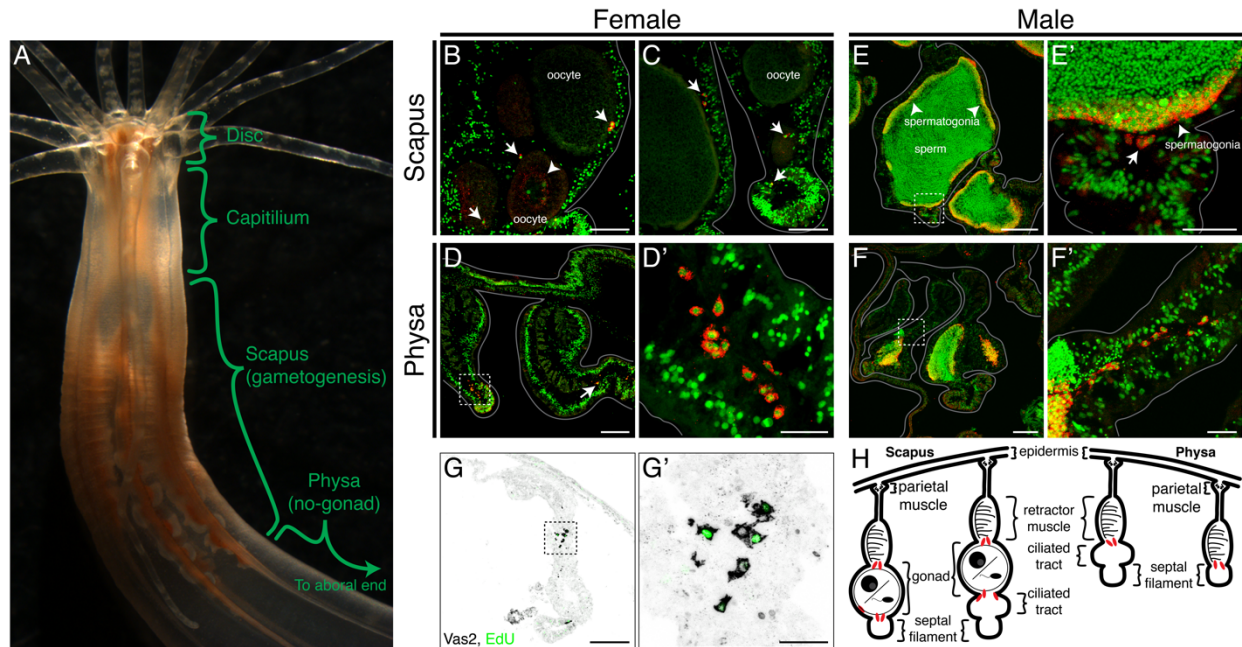

**Fig. S2. Adult PGC-like lineages localize adjacent to the mature gonad and migrate aborally.** (A) Along the oral-aboral axis, adult *Nematostella* can be regionally subdivided into the disc (mouth and tentacle base), capitillum (pharynx), scapus (gametogenic region) and physa (non-gametogenic region; Williams, 1979). (B-F') Female and male cross sections were immunolabeled with Vas2 (red) and counter-stained for nuclei (green). PGC-like cells (arrows in B-C and E') localize next to the maturing oocytes and sperm stem cells (spermatogonia, arrowheads in E-E'), which divide and give rise to sperm in the sperm cyst lumen. Note there are Vas2 puncta surrounding the nuclei of maturing oocytes (arrowhead in B) and spermatogonia. (D-D', F-F' and G-G') PGC-like cells also localize aborally in the physa, the site of occasional asexual fission (Hand and Uhlinger, 1995; Burton and Finnerty, 2009). Aboral migration may thus ensure fertility in asexually-produced progeny. (G-G') PGC-like cells incorporate EdU (green), consistent with proliferative activity. (H) Schematic diagrams depict the cross-sectional localization of PGC-like cells (red) in adult mesenteries. Scale bar = 50  $\mu$ m in B and C; 100  $\mu$ m in D, E, F and G; 20  $\mu$ m in D', E', F', and G'.

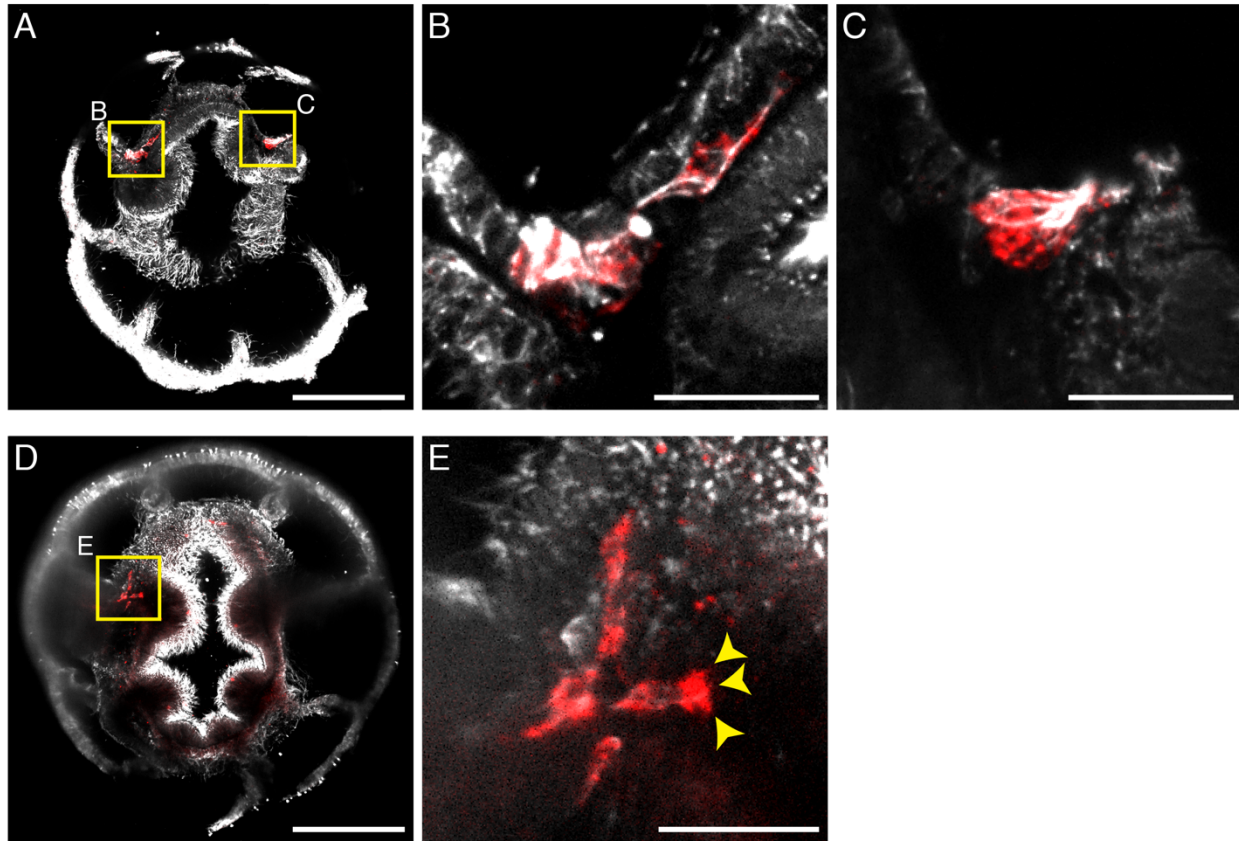

**Fig. S3. Migratory PGCs show fibroblast morphology and filopodia.** (A-E) Representative images show the microtubule cytoskeleton ( $\alpha$ -Tubulin, *grey*) of PGCs (*red*) and their filopodia-like protrusions (*yellow arrowheads*, E). Scale bar = 100  $\mu$ m in A and D; 20  $\mu$ m in B-C and E.

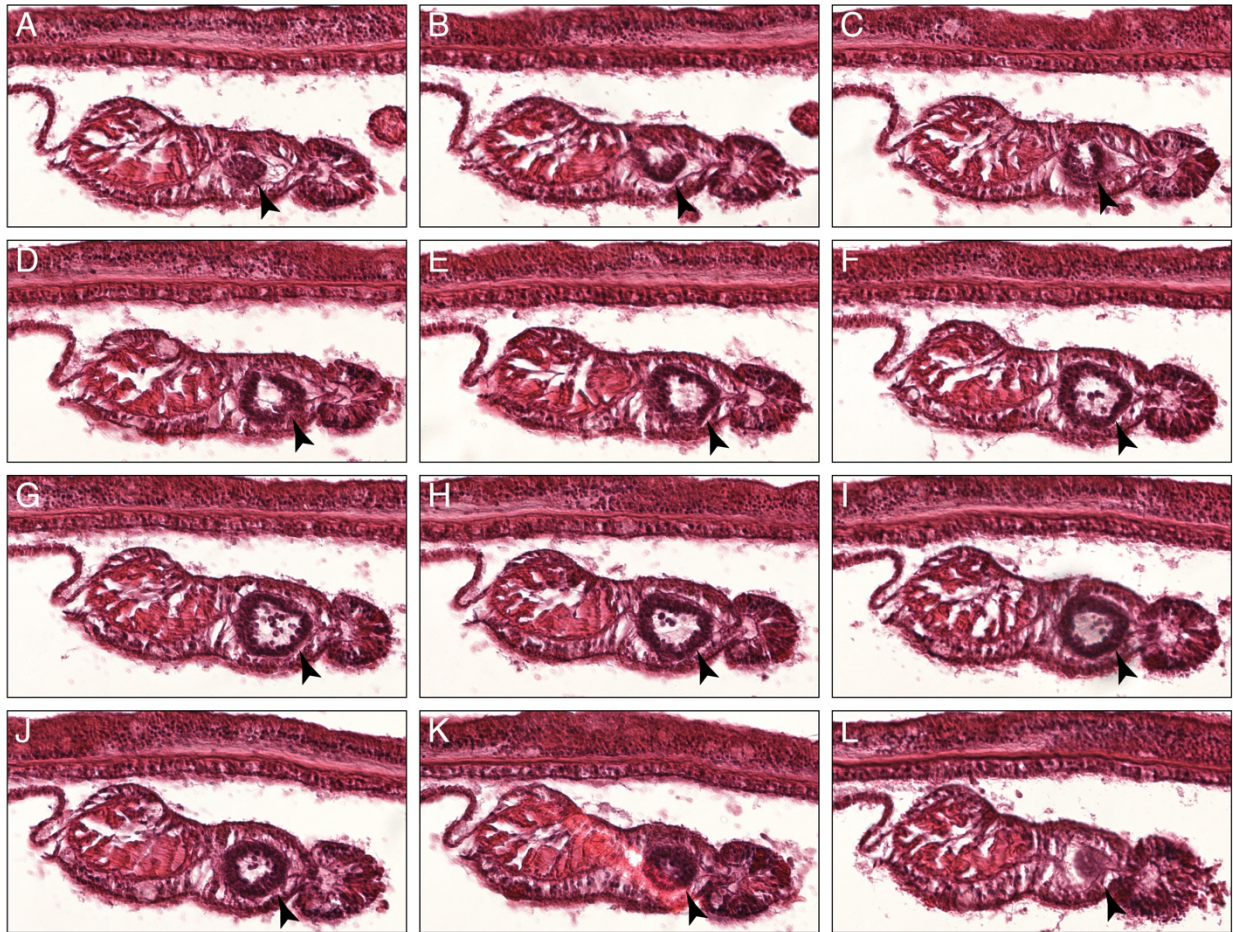

**Fig. S4. Serial cross sections of a juvenile male mesentery.** Germline stem cells (spermatogonia) form cysts (*black arrowheads*) and give rise to maturing sperm in the cyst lumen.

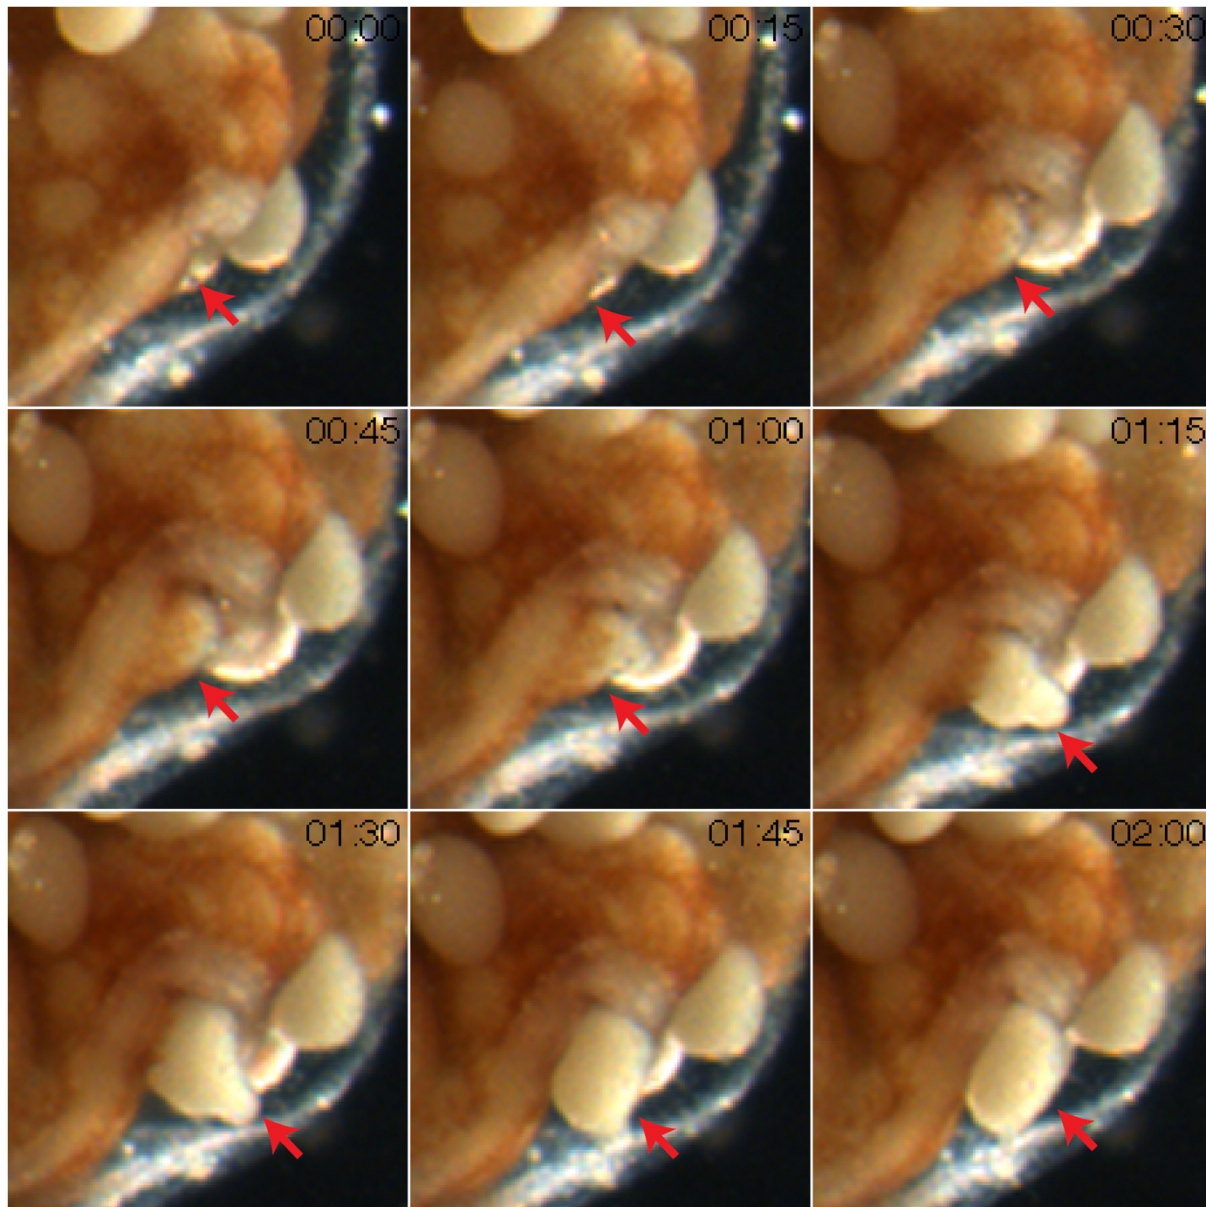

**Fig. S5. Serial time frames of an oocyte rupturing out of gonad epithelium during spawning.**  
The frames correspond to the green dot-labeled oocyte of Supplementary MOV. 2, 13:00 to 15:00.



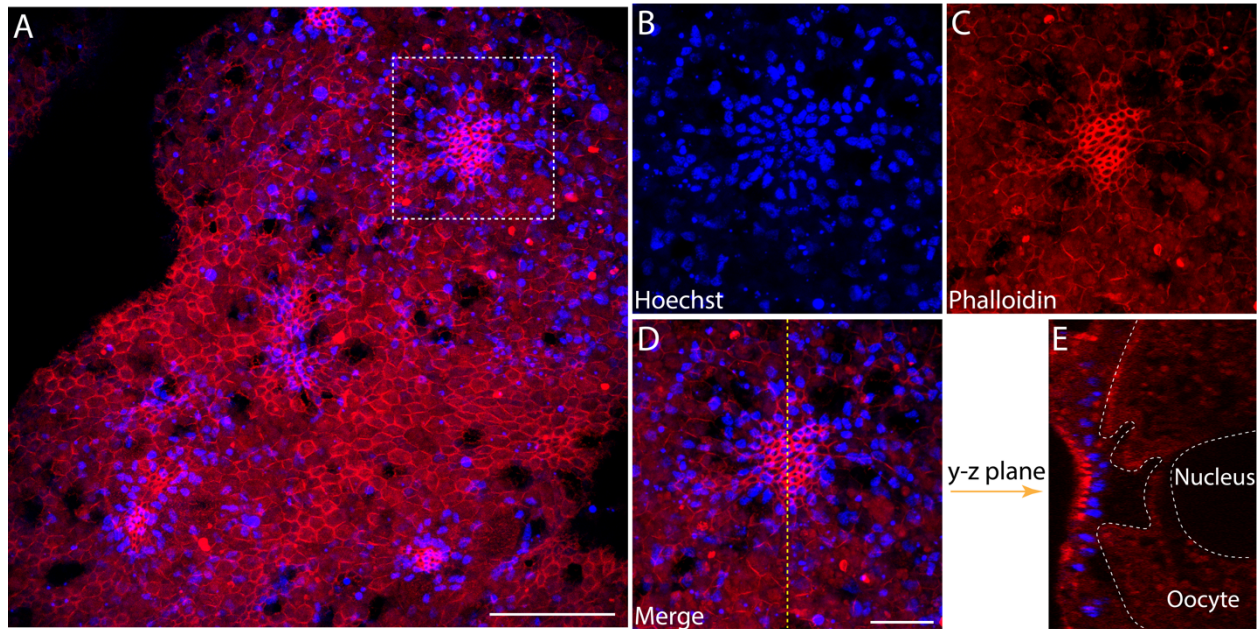

**Fig. S6. Trophocytes aggregate on the female gonad epidermis and concentrate above the maturing oocyte.** (A) Apical view of female gonad epidermis. (B-D) Single channel images of the box in A. Specialized gonad epithelial cells, trophocytes, form trophonema and enrich F-actin on the apical pole, as labelled by Phalloidin in C. (E) Optical cross section taken along the dotted line in D, showing that the trophonema directly overlays a developing oocyte in the gonad lumen. Scale bar = 50  $\mu\text{m}$  in A; 20  $\mu\text{m}$  in D. B-E are at the same scale.

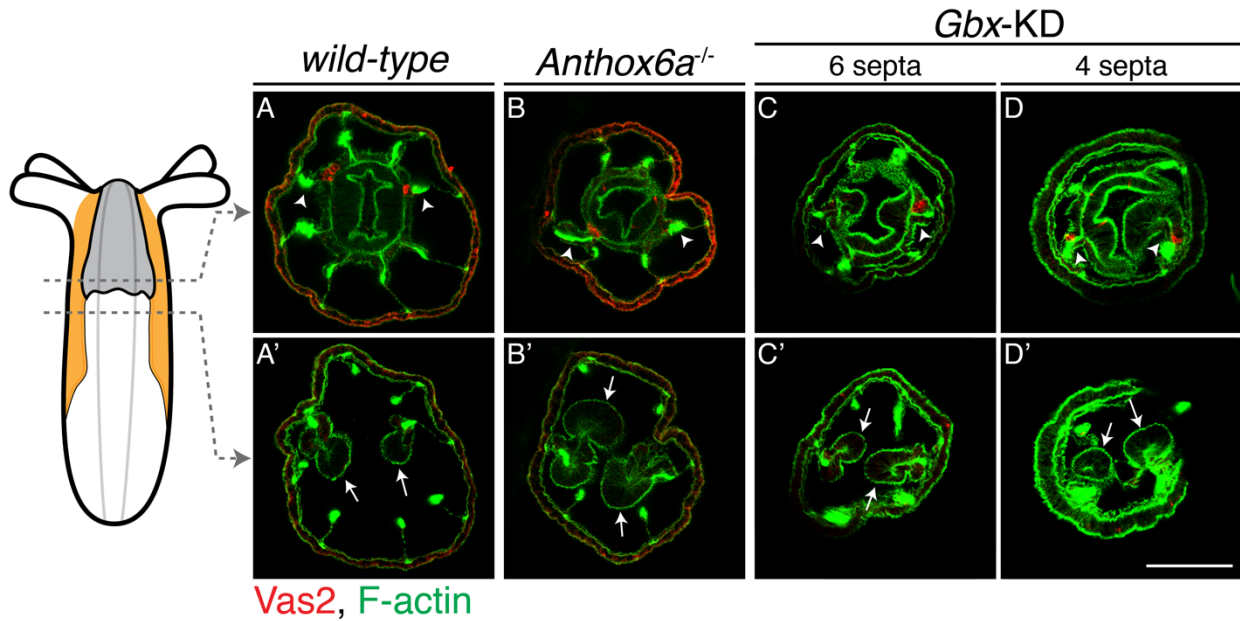

**Fig. S7.** PGC clusters are specified on mesenteries with primary septal filaments of wild-type, *Anthox6a* mutant and *Gbx* shRNA knockdown primary polyps. Although primary mesenteries are missing in *Anthox6a* mutants or *Gbx* shRNA knockdown primary polyps, PGCs (red) are specified on the mesenteries (arrowheads) where primary septal filaments attach (arrows). Scale bar = 50  $\mu$ m in **D'**. All images are at the same scale.

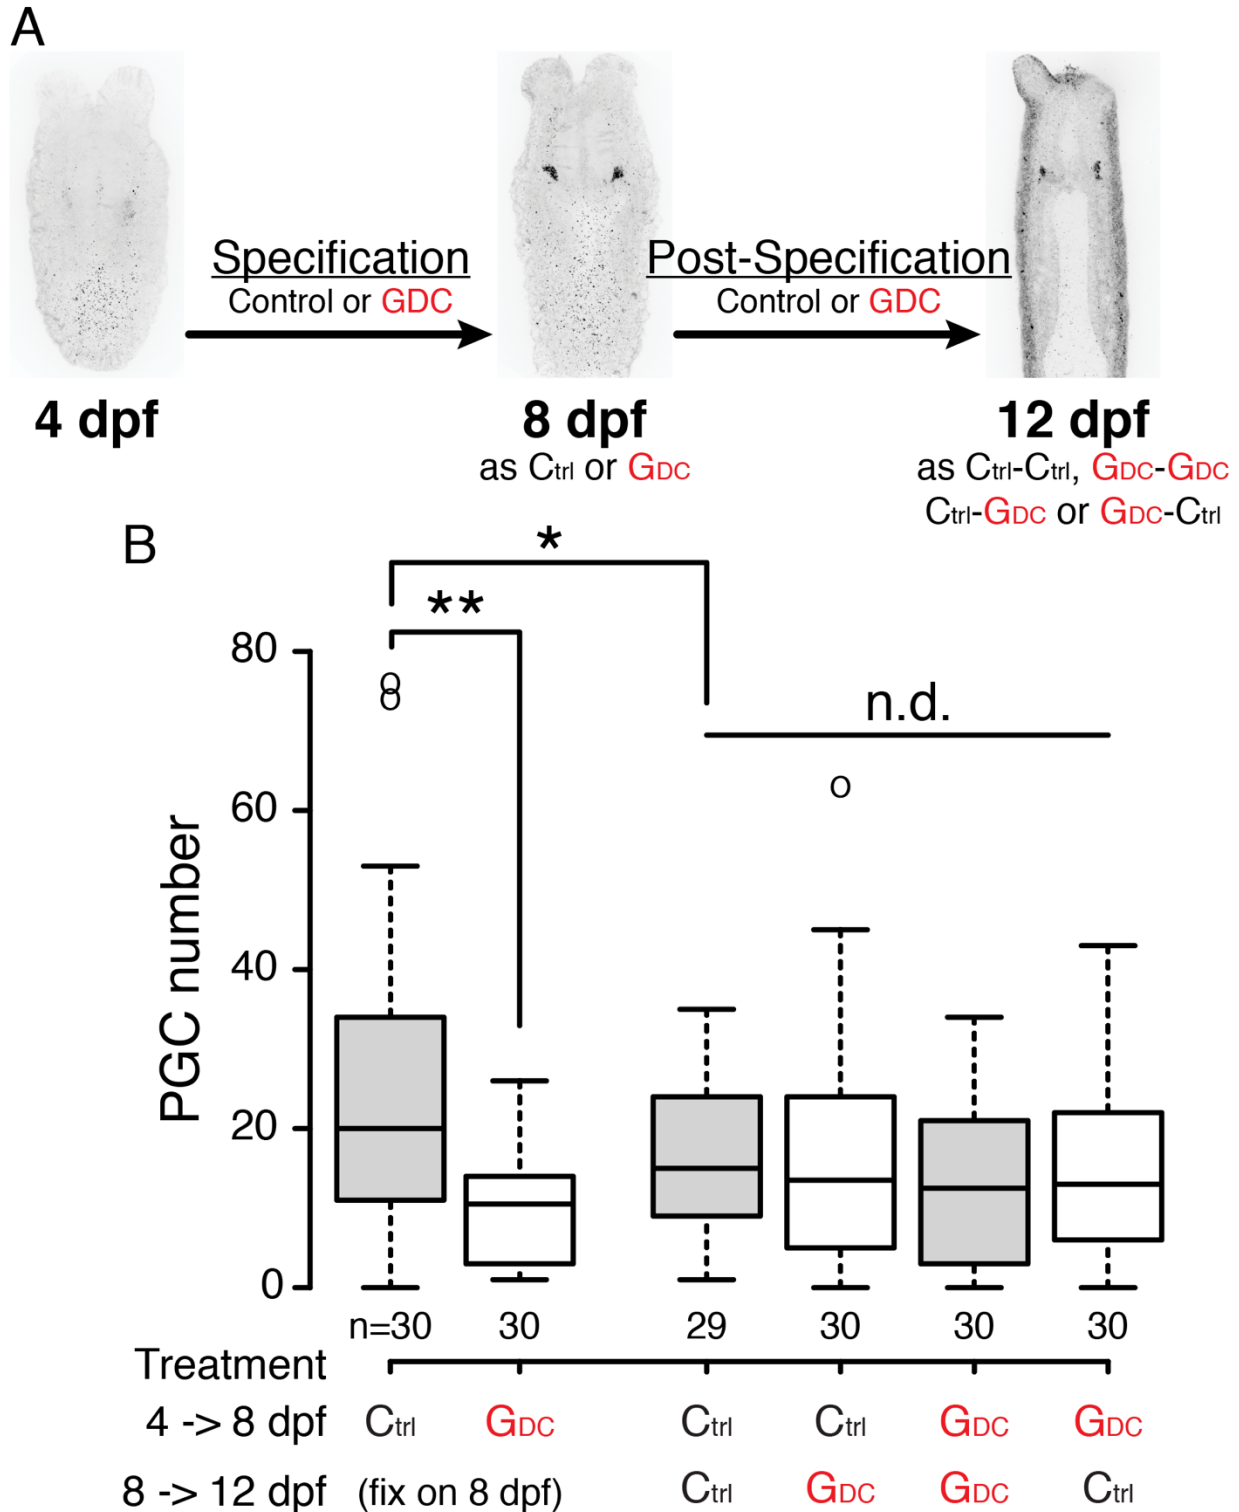

**Fig. S8. The Hh signaling pathway does not affect PGC behaviors after formation.** (A) Design of Hh signaling inhibitor GDC-0449 treatments: 4 to 8 dpf larvae were tested for PGC specification, and 8 to 12 dpf polyps were tested for PGC behaviors post-specification. Ctrl: DMSO treatment.

GDC: 25  $\mu$ M GDC-0449 treatment. **(B)** Quantification of PGC numbers after treatments. During PGC specification (4-8 dpf), GDC-0449 resulted in significantly less PGC formation than control. After PGCs are specified (after 8 dpf), PGC number does not show any statistical difference among treatments. \*\* represents  $p < 0.01$  of two-tailed t-test by comparing with DMSO control. n.d.: no-statistically significant difference.

**Sup. Mov.1. 3D reconstruction of pharyngeal structures.** PGCs (*magenta*) are specified on the epithelium of the two primary mesenteries, close to the pharynx (*cyan* cells in the center). The endomesodermal nuclei are pseudocolored in *blue*, and the ectodermal nuclei are in *cyan*.

**Sup. Mov.2. Oocyte spawning time lapse movie.** Nine representative oocytes were tracked by colored dots when rupturing out of the mesentery epithelium. In normal spawning, oocytes mix with egg jelly inside the female body column before the egg mass is pushed out of the pharynx and fertilized *ex vivo*. The time lapse video was taken at 15 sec/frame. The movie is at 30X speed.
